1 Title: Extensive CD8 $\beta$  depletion does not prevent control of viral replication or protection from  
2 challenge in macaques chronically infected with a live attenuated simian immunodeficiency virus.

3

4 Authors:

5 Matthew S. Sutton<sup>a</sup>, Amy Ellis-Connell<sup>a</sup>, Alexis J. Balgeman<sup>a</sup>, Gabrielle Barry<sup>b</sup>, Andrea M.  
6 Weiler<sup>b</sup>, Scott J. Hetzel<sup>c</sup>, Yan Zhou<sup>e</sup>, Annie Kilby<sup>e</sup>, Rosemarie D. Mason<sup>e</sup>, Kristin K. Biris<sup>e</sup>, John  
7 R. Mascola<sup>e</sup>, Nancy J. Sullivan<sup>e</sup>, Mario Roederer<sup>e</sup>, Thomas C. Friedrich<sup>b,d</sup>, and Shelby L.  
8 O'Connor<sup>a,b</sup>.

9

10 Affiliations

11 <sup>a</sup> Department of Pathology and Laboratory Medicine, UW-Madison, Madison, WI

12 <sup>b</sup> Wisconsin National Primate Research Center, UW-Madison, Madison, WI

13 <sup>c</sup> Department of Biostatistics and Medical Informatics, UW-Madison, Madison, WI

14 <sup>d</sup> Department of Pathobiological Sciences, UW-Madison, Madison, WI

15 <sup>e</sup> Vaccine Research Center, National Institute of Allergy and Infectious Diseases, National  
16 Institutes of Health, Bethesda, MD

17

18 Running Head: Importance of CD8 $\alpha\beta$ + T cells during live attenuated SIV infection

19

20 #Address correspondence to Shelby L. O'Connor, [slfeinberg@wisc.edu](mailto:slfeinberg@wisc.edu), (608) 890-0843

21 **Abstract: (word count: 249)**

22 We evaluated the contribution of CD8 $\alpha\beta$ <sup>+</sup> T cells on control of live-attenuated simian  
23 immunodeficiency virus (LASIV) replication during chronic infection and subsequent protection  
24 from pathogenic SIV challenge. Unlike previous reports with a CD8 $\alpha$ -specific depleting  
25 monoclonal antibody (mAb), the CD8 $\beta$ -specific mAb CD8 $\beta$ 255R1 selectively depleted CD8 $\alpha\beta$ <sup>+</sup>  
26 T cells without also depleting non-CD8<sup>+</sup> T cell populations that express CD8 $\alpha$ , such as natural  
27 killer (NK) cells and  $\gamma\delta$  T cells. Following infusion with CD8 $\beta$ 255R1, plasma viremia transiently  
28 increased coincident with declining peripheral CD8 $\alpha\beta$ <sup>+</sup> T cells. Interestingly, plasma viremia  
29 returned to pre-depletion levels even when peripheral CD8 $\alpha\beta$ <sup>+</sup> T cells did not. Although depletion  
30 of CD8 $\alpha\beta$ <sup>+</sup> T cells in the lymph node (LN) was incomplete, frequencies of these cells were three-  
31 fold lower ( $p=0.006$ ) in animals that received CD8 $\beta$ 255R1 compared to control IgG. It is possible  
32 that these residual SIV-specific CD8 $\alpha\beta$ <sup>+</sup> T cells may have contributed to suppression of viremia  
33 during chronic infection. We also determined whether infusion of CD8 $\beta$ 255R1 in the LASIV-  
34 vaccinated animals increased their susceptibility to infection following intravenous challenge with  
35 pathogenic SIVmac239. We found that 7/8 animals infused with CD8 $\beta$ 255R1, and 3/4 animals  
36 infused with the control IgG, were resistant to SIVmac239 infection. These results suggest that  
37 infusion with CD8 $\beta$ 255R1 did not eliminate the protection afforded to LASIV vaccination. This  
38 provides a comprehensive description of the impact of CD8 $\beta$ 255R1 infusion on the immunological  
39 composition of the host, when compared to an isotype matched control IgG, while showing that  
40 the control of LASIV viremia and protection from challenge can occur even after CD8 $\beta$ 255R1  
41 administration.

42

43

44 **Importance: (word count: 124)**

45         Studies of SIV-infected macaques that deplete CD8<sup>+</sup> T cells *in vivo* with monoclonal  
46 antibodies have provided compelling evidence for their direct antiviral role. These studies utilized  
47 CD8 $\alpha$ -specific mAbs that target both the major (CD8 $\alpha\beta$ <sup>+</sup>) and minor (CD8 $\alpha\alpha$ <sup>+</sup>) populations of  
48 CD8<sup>+</sup> T cells, but additionally deplete non-CD8<sup>+</sup> T cell populations that express CD8 $\alpha$ , such as  
49 NK cells and  $\gamma\delta$  T cells. In the current study, we administered the CD8 $\beta$ -specific depleting mAb  
50 CD8 $\beta$ 255R1 to cynomolgus macaques chronically infected with a LASIV to selectively deplete  
51 CD8 $\alpha\beta$ <sup>+</sup> T cells without removing CD8 $\alpha\alpha$ <sup>+</sup> lymphocytes. We evaluated the impact on control of  
52 virus replication and protection from pathogenic SIVmac239 challenge. These results underscore  
53 the utility of CD8 $\beta$ 255R1 for studying the direct contribution of CD8 $\alpha\beta$ <sup>+</sup> T cells in various disease  
54 states.

55

56 **Introduction: (word count: 776)**

57         Multiple lines of evidence suggest that CD8<sup>+</sup> T cells contribute to control of virus  
58 replication and subsequently influence disease progression following human immunodeficiency  
59 virus (HIV) infection. For instance, the emergence of HIV-specific CD8<sup>+</sup> cytotoxic T lymphocytes  
60 (CTLs) during acute infection is temporally associated with decreases in peak viral load and the  
61 decline of viral replication to set point viral load (1, 2). Indeed, CD8<sup>+</sup> CTLs have been shown to  
62 lyse HIV-infected cells *in vitro*, and the selective pressure they exert *in vivo* often leads to the  
63 emergence of immune escape variants (3–7). The strongest argument comes from studies of  
64 macaques infected with simian immunodeficiency virus (SIV) that are infused with a monoclonal  
65 antibody (mAb) that is specific for the CD8 $\alpha$  molecule of CD8<sup>+</sup> lymphocytes. Following infusion  
66 with this antibody, depletion of CD8 $\alpha$ <sup>+</sup> cells persists for approximately 2 to 4 weeks and is

67 accompanied by a transient increase in virus replication until control is regained coincident with  
68 the reemergence of CD8 $\alpha$ + lymphocytes (8-12, 14, 31, 45-48, 53-54). Of note, control of virus  
69 replication is lost following *in-vivo* depletion of CD8+ lymphocytes even during antiretroviral  
70 therapy (ART), further suggesting that functional CD8+ T cells are needed to maintain effective  
71 viral control even while on ART (11, 12). Notably, however, CD8 $\alpha$ -specific mAbs deplete not  
72 only CD8+ T cells, but also a variety of cell populations that express the CD8 $\alpha$  molecule.

73 The CD8 molecule is expressed as either a CD8 $\alpha\alpha$  homodimer or a CD8 $\alpha\beta$  heterodimer on  
74 the cell surface and is present on lymphocytes of both the innate and adaptive immune system (15,  
75 16, 18, 49). The most common lymphocytes to express CD8 are conventional CD8+ T cells  
76 (TCR $\alpha\beta$ +CD3+), which can be divided into a major population that express CD8 $\alpha\beta$  and a minor  
77 population that express CD8 $\alpha\alpha$  (13). There also exist populations of TCR $\gamma\delta$ +CD3+ T cells and  
78 CD3- natural killer (NK) cells that express CD8 $\alpha\alpha$  (17, 18, 52).  $\gamma\delta$  T cells (TCR $\gamma\delta$ +CD3+CD8 $\alpha\alpha$ +)   
79 which comprise ~ 6% of CD3+ T cells (17) can block HIV-1 entry via the secretion of  $\beta$ -  
80 chemokines (23), enhance antibody-dependent cellular cytotoxicity (ADCC) (24), and directly  
81 lyse HIV-infected cells (25). NK cells (CD3-CD8 $\alpha\alpha$ +) comprise ~16% of peripheral lymphocytes,  
82 and have recently been reported to possess traits of adaptive immunity that may contribute to  
83 control of HIV-1 replication (19, 20). Accordingly, the contribution of conventional CD8+ T cells  
84 to viral control are complicated by the depletion of additional cell populations that express CD8 $\alpha$   
85 when using CD8 $\alpha$ -depleting mAbs (10, 14, 53). One approach to better define the antiviral role of  
86 CD8+ T cells *in vivo* is to administer a CD8 $\beta$ -specific depleting mAb, as this should selectively  
87 deplete CD8 $\alpha\beta$ + T cells without removing CD8 $\alpha\alpha$ + lymphocytes or other non-T cell populations.  
88 Indeed, two recent studies using the CD8 $\beta$ -specific mAb CD8 $\beta$ 255R1 in rhesus macaques provide  
89 evidence that CD8 $\alpha\beta$ + T cells can be specifically depleted *in vivo* (40, 41).

90 Macaques vaccinated with SIVmac239 $\Delta$ nef, a live-attenuated SIV (LASIV) variant of  
91 pathogenic SIVmac239, are useful for evaluating the role of CD8 $\alpha\beta$ <sup>+</sup> T cells in control of virus  
92 replication and protection from SIV challenge. Although rare hosts spontaneously control  
93 pathogenic HIV or SIV in a manner dependent on particular major histocompatibility complex  
94 (MHC) alleles, control of SIVmac239 $\Delta$ nef replication occurs in nearly every vaccinated animal,  
95 regardless of host MHC genetics (27-31). These observations question whether the contribution of  
96 conventional CD8 $\alpha\beta$ <sup>+</sup> T cells to control of SIVmac239 $\Delta$ nef is equivalent to their contribution to  
97 control of pathogenic SIV. Moreover, vaccination with SIVmac239 $\Delta$ nef is the most successful  
98 example of vaccine-induced protection from challenge with homologous SIV strains and, less  
99 frequently, from challenge with heterologous SIV strains (31–34). After more than 25 years of  
100 effort, the precise immune mechanism(s) responsible for this protection are still under debate (35–  
101 39). Thus, defining whether SIVmac239 $\Delta$ nef-mediated vaccine protection requires CD8 $\alpha\beta$ <sup>+</sup> T  
102 cells may also help inform either therapeutic or prophylactic HIV vaccine design.

103 In this study, we utilize the CD8 $\beta$ -specific mAb CD8 $\beta$ 255R1 to specifically deplete  
104 CD8 $\alpha\beta$ <sup>+</sup> T cells in LASIV-vaccinated Mauritian cynomolgus macaques (MCMs) (42), and then  
105 measure the impact on control of LASIV replication and protection from pathogenic SIV  
106 challenge. In contrast to two recent studies that evaluated the impact of CD8 $\beta$ 255R1 in SIV-  
107 infected or SHIV-infected rhesus macaques (40, 41), we include animals treated with a control  
108 IgG to distinguish those immunological effects specific to CD8 $\beta$ -depletion from those that are a  
109 result of infusion of a nonspecific IgG antibody. We also determine whether depletion of CD8 $\alpha\beta$ <sup>+</sup>  
110 T cells affects the frequency and proliferative capacity of CD8 $\alpha\alpha$ <sup>+</sup> T cells, NK cells, and  $\gamma\delta$  T  
111 cells. Thus, we expand the current knowledge of the immunological effects that follow infusion

112 with CD8 $\beta$ 255R1 and provide the first comprehensive comparison to an isotype matched control  
113 IgG.

114

## 115 **Materials and Methods:**

116 **Animal care and use:** Two Vietnamese-origin cynomolgus macaques were purchased from  
117 Covance Inc. and included in the depletion study of naïve cynomolgus macaques. Both animals  
118 were housed and cared for at NIHAC-Poolesville (National Institutes of Health Animal Center)  
119 according to protocols approved by the Vaccine Research Center Animal Care and Use  
120 Committee. Both animals received a single 50mg/kg intravenous infusion of the anti-CD8 $\beta$   
121 monoclonal antibody (mAb) CD8 $\beta$ 255R1.

122       Eleven Mauritian cynomolgus macaques (MCMs) were purchased from Bioculture Ltd.  
123 and included in the depletion/challenge study of cynomolgus macaques chronically infected with  
124 a LASIV. These MCMs were housed and cared for by the Wisconsin National Primate Research  
125 Center (WNPRC) according to protocols approved by the University of Wisconsin Graduate  
126 School Animal Care and Use Committee. All eleven animals were previously infected  
127 intravenously with 10ng p27 of wild-type SIVmac239 $\Delta$ nef (cy0749 and cy0752) or a variant of  
128 SIVmac239 $\Delta$ nef containing 10 nonsynonymous mutations (cy0685, cy0688, cy0690, cy0691,  
129 cy0750, cy0753, cy0755, cy0756, and cy0757) for 34 to 73 weeks prior to the start of this study  
130 (42). All animals were homozygous for the M3 MHC haplotype, with the exception of cy0691 that  
131 was heterozygous for the M2 and M3 MHC haplotypes. Seven MCMs received a single 50mg/kg  
132 intravenous infusion of the anti-CD8 $\beta$  monoclonal antibody (mAb) CD8 $\beta$ 255R1 and four MCMs  
133 received a single 50mg/kg intravenous infusion of the DSPR1 rhesus recombinant IgG control  
134 mAb, both of which were provided by the NIH Nonhuman Primate Reagent Resource (R24

135 OD010976, U24 AI126683). All eleven MCMs were challenged intravenously with 100TCID50  
136 SIVmac239 (0.71ng p27) four weeks following mAb infusion.

137

138 **Antibodies:** CD3-AF700 (clone: SP34-2; BD Biosciences), CD4-BV711 (clone: OKT4;  
139 BioLegend), CD8 $\alpha$ -PE (clone: DK25; Dako), CD8 $\beta$ -ECD (clone: 2ST8-5H7; Beckman Coulter),  
140 TCR $\gamma\delta$ -FITC (clone: 5A6.E9; Invitrogen), CD95-PE/Cy5 (clone: DX2; BD Biosciences), CD28-  
141 BV510 (clone: CD28.2; BD Biosciences), CCR7-Pacific Blue (clone: G043H7; BioLegend),  
142 NKG2a-PE/Cy7 (clone: Z199; Beckman Coulter), CD16-BV650 (clone: 3G8; BD Biosciences),  
143 CD16-BV786 (clone: 3G8; BD Biosciences), and Ki-67-AF647 (clone: B56; BD Biosciences).  
144 LIVE/DEAD Fixable Near-IR Dead Cell Stain (Invitrogen) was used to assess cell viability. All  
145 samples were run on the LSR II (BD Biosciences) and analyzed using FlowJo, Version 9.9.6 (BD  
146 Biosciences). The presence of the CD8 $\beta$ 255R1 mAb does not cross-block binding with the anti-  
147 CD8 $\beta$  clone 2ST8-5H7 (40).

148

149 **Peptides.** The NIH AIDS Research and Reference Reagent Program (Germantown, MD) provided  
150 15-mer peptides overlapping by 11 amino acid positions that spanned the entire SIVmac239  
151 proteome. Gag and Env peptides were combined into 2 and 3 pools, respectively, and used at a  
152 final pooled concentration of 5 $\mu$ M during stimulation.

153

154 **Lymphocyte isolation and phenotype staining.** In the depletion study of naïve cynomolgus  
155 macaques, phenotype staining of peripheral blood mononuclear cells (PBMCs) was performed in  
156 triplicate on whole blood and in duplicate on lymph node samples. Cells were incubated with a  
157 surface antibody mix for 25 minutes in the dark at room temperature. In the depletion/challenge

158 study, PBMC were isolated from EDTA-anticoagulated blood by ficoll-based density  
159 centrifugation as previously described (34). Cells were resuspended in RPMI 1640 (HyClone)  
160 supplemented with 10% fetal calf serum (FCS), 1% antibiotic-antimycotic (HyClone), and 1% L-  
161 glutamine (HyClone) (R10 medium). Approximately  $0.5-1.0 \times 10^6$  PBMC were placed in cluster  
162 tubes (Fisher Scientific) and washed with 1x phosphate-buffered saline (PBS) prior to staining.  
163 Surface antibodies were added and cells were incubated for 30 min in the dark at room temperature.  
164 Cells were then washed twice with 1x PBS supplemented with 10% FCS (10% FCS/PBS), and  
165 fixed with 2% paraformaldehyde (PFA) for a minimum of 30 minutes. Fixed cells were then  
166 washed once with 1x PBS and then permeabilized with Medium B (Invitrogen, Carlsbad CA) and  
167 allowed to incubate with intracellular antibodies for 30 min in the dark at room temperature. Cells  
168 were then washed twice with 10% FCS/PBS and resuspended in 2% PFA prior to data collection.  
169 Following exclusion of doublets and dead cells, lymphocyte populations were defined as follows:  
170 CD8 $\alpha\beta$ + T cells: CD3+CD4-TCR $\gamma\delta$ -CD8 $\alpha$ +CD8 $\beta$ +; CD8 $\alpha\alpha$ + T cells: CD3+CD4-TCR $\gamma\delta$ -  
171 CD8 $\alpha$ +CD8 $\beta$ -;  $\gamma\delta$  T cells: CD3+CD4-CD8 $\beta$ -CD8 $\alpha$ +TCR $\gamma\delta$ +; NK cells: CD3-CD4-  
172 CD8 $\alpha$ +NKG2a+CD16+; CD4 T cells (naive): CD3+CD4+CD8 $\alpha$ -CD95-CD28+CCR7+; CD4 T  
173 cells (effector memory): CD3+CD4+CD8 $\alpha$ -CD95+CD28-CCR7-; CD4 T cells (central memory):  
174 CD3+CD4+CD8 $\alpha$ -CD95+CD28+CCR7+.

175

176 **Intracellular cytokine staining (ICS).** Flow cytometry was used to measure intracellular cytokine  
177 expression as previously described (59). Cryopreserved cells isolated from LNs were thawed and  
178 washed twice in warm R10 medium and allowed to rest at 37°C overnight prior to stimulation. Ki-  
179 67 was used to measure the proliferative capacity of lymphocytes freshly-isolated from blood, and  
180 IFN- $\gamma$ , tumor necrosis factor alpha (TNF- $\alpha$ ), and CD107a was used to measure SIV-specific



181 responses in cryopreserved lymphocytes isolated from LNs at week 3 post mAb infusion. LN cells  
182 were incubated with CD107a and stimulated with Gag or Env peptide pools for a total of 6 hours,  
183 with brefeldin A (Sigma-Aldrich) and monensin (BioLegend) added 1 hour after stimulation.  
184 PBMC and LN cells were incubated with LIVE/DEAD fixable near-infrared dead cell stain for 20  
185 minutes, incubated with surface markers for 30 minutes, and fixed with 2% paraformaldehyde  
186 (PFA) for at least 20 minutes. Medium B (Invitrogen) was used to permeabilize PBMC and 0.1%  
187 saponin was used to permeabilize LN cells. PBMC and LN cells were stained for 30 minutes with  
188 Ki-67 or IFN- $\gamma$  and TNF- $\alpha$ , respectively. Data were collected on an LSR II instrument (BD  
189 Biosciences) using 2% PFA-fixed cells and then analyzed using FlowJo version 9.9.6 (BD  
190 Biosciences).

191  
192 **Plasma viral load analysis.** Plasma was isolated alongside PBMC and cryopreserved at -80°C  
193 prior to analysis. SIV *gag* viral loads were determined as previously described (34). Briefly, viral  
194 RNA (vRNA) was isolated from plasma, reverse transcribed, and amplified with the Superscript  
195 III platinum one-step quantitative reverse-transcription-PCR (RT-PCR) system (Invitrogen). The  
196 detection limit of the assay was 100 vRNA copy equivalents per mL of plasma (copies/mL). When  
197 the viral load was at or below the limit of detection, the detection limit value of 100 was reported.  
198 Full length *nef* and  $\Delta$ *nef* viral loads were determined as previously described (34). Briefly, highly-  
199 specific real-time RT-PCR assays were used with primers that accurately differentiate viruses  
200 containing full-length *nef* from those that contain *nef* with a 182 base-pair (bp) deletion, using the  
201 methods described above. Serial dilutions of *in vitro* transcripts for both full-length *nef* and *nef*  
202 with a 182-bp deletion were used as internal standards for each run. The same machines and

203 software used for the *gag* viral load assay were used to detect and quantify the *nef* and  $\Delta$ *nef* viral  
204 loads. The limit of detection was identical to that for the SIV *gag* viral load assay.

205

206 **Virus Neutralization Assays.** SIV Env pseudoviruses were produced as previously described  
207 (43). Briefly, plasmid DNA encoding SIV gp160 was combined with a luciferase reporter plasmid  
208 containing the essential HIV structural genes to produce pseudoviruses expressing  
209 SIVmac251.H9, SIVmac251.30, SIVsmE660.CP3C, or SIVmac239 Env. Using TZM-bl target  
210 cells, virus neutralization was measured following incubation with SIV-Env pseudovirus and  
211 plasma collected from blood. The 50% inhibitory dilution (ID<sub>50</sub>) was defined as the plasma  
212 dilution that caused a 50% reduction in relative light units (RLU) compared to virus control wells  
213 following subtraction of background RLU. A nonlinear-regression 5-parameter Hill slope equation  
214 was used to calculate plasma ID<sub>50</sub> values.

215

216 **Statistical Analyses.** Comparison of two groups in Figures 2b-c, 4c-d, and 5d-f was conducted  
217 using Wilcoxon rank sum tests. Comparison of changes from baseline separately for each  
218 treatment group shown in Figures 2a, 3, 4a-b, and 5a-c utilized repeated measures ANOVA (RM-  
219 ANOVA) to estimate the mean contrasts with animal as a random effect. Comparison between  
220 both groups in changes from pre-treatment levels at multiple follow-up time points also utilized  
221 RM-ANOVA with treatment, time, and their interaction as fixed effects, and animal as a random  
222 effect. Model assumptions of RM-ANOVA were examined and were not deemed to be grossly  
223 violated. Dunnett's p-value adjustment for multiple testing over multiple time points was used to  
224 keep a family-wise 0.05 type 1 error rate (58). All tests were conducted using a two-sided

225 significance level of 0.05. All analyses were conducted using R for statistical computing version  
226 3.3 (44).

227 **Results:**

228 **Infusion with CD8 $\beta$ 255R1 selectively depletes CD8 $\alpha\beta$ <sup>+</sup> T cells in naïve cynomolgus**  
229 **macaques.** Previous reports of CD8 $\beta$ -depletion following infusion with the anti-CD8 $\beta$  mAb  
230 CD8 $\beta$ 255R1 were performed exclusively with rhesus macaques (40, 41). To determine whether  
231 CD8 $\beta$ 255R1 can similarly deplete CD8 $\alpha\beta$ <sup>+</sup> T cells in cynomolgus macaques, two naïve animals  
232 (A12412 and A12372) were intravenously infused with a single 50 mg/kg dose of the anti-CD8 $\beta$   
233 mAb CD8 $\beta$ 255R1 and evaluated for 15 weeks. Flow cytometry was used to monitor CD8 $\alpha\beta$ <sup>+</sup> T  
234 cells in peripheral blood mononuclear cells (PBMC) and peripheral lymph nodes (LNs) before and  
235 after infusion in both animals. Depletion of peripheral CD8 $\alpha\beta$ <sup>+</sup> T cells was rapid and sustained  
236 (Figure 1a, top) with declines in the percentage of lymphocytes relative to baseline reaching its  
237 nadir at week 2 (A12412: 89%, A12372: 99%), and remaining substantially reduced at week 15  
238 (A12412: 75%, A12372: 85%). Levels of circulating CD4<sup>+</sup> T cells increased transiently following  
239 infusion (Figure 1a, middle), while circulating NK cells were relatively unchanged over the course  
240 of 15 weeks (Figure 1a, bottom).

241 Depletion of LN CD8 $\alpha\beta$ <sup>+</sup> T cells after administration of the CD8 $\beta$ 255R1 mAb has been  
242 reported in rhesus macaques (<http://www.nhpreagents.org/NHP/availableagents.aspx?Cat=2>).  
243 We also observed reductions in LN CD8 $\alpha\beta$ <sup>+</sup> T cells (Figure 1b, top) in both cynomolgus macaques  
244 at week 2 (mean: 94.5%; range: 94% to 95%) that remained reduced by approximately 84% at  
245 week 15 (range: 80% to 88%) when compared to pre-depletion levels. Similar to our observations  
246 in the blood, we detected elevated levels of CD4<sup>+</sup> T cells in LNs (Figure 1b, middle) that persisted  
247 for 15 weeks following infusion while levels of NK cells in LNs (Figure 1b, bottom) remained  
248 largely unaffected for 15 weeks. These results are not surprising, as a decrease in the frequency of  
249 CD3<sup>+</sup> T cells that are CD8<sup>+</sup> will correspond to an increase in the frequency of CD3<sup>+</sup> cells that are

250 CD4<sup>+</sup> in the same compartment. To our knowledge, this is the first assessment of the  
251 immunological effects following infusion with CD8 $\beta$ 255R1 in cynomolgus macaques, and these  
252 results are similar to those observed in rhesus macaques (40, 41).

253

254 **Impact of CD8 $\beta$ 255R1 infusion on CD8 $\alpha\beta$ <sup>+</sup> T cells during chronic LASIV infection.** Seven  
255 MCMs chronically infected with either SIVmac239 $\Delta$ nef (n=2) or a SIVmac239 $\Delta$ nef variant (n=5)  
256 (42) received a single 50 mg/kg intravenous infusion of the anti-CD8 $\beta$  mAb CD8 $\beta$ 255R1. Four  
257 MCMs infected with the same SIVmac239 $\Delta$ nef variant received a single 50 mg/kg intravenous  
258 infusion of an isotype-matched rhesus recombinant IgG mAb. All animals had been infected with  
259 LASIV for different lengths of time, as they were used in previous studies of T cell mediated  
260 control of acute SIV replication (42). Four weeks after the CD8 $\beta$ 255R1 or IgG control antibody  
261 was administered, animals were challenged intravenously with 100TCID<sub>50</sub> (0.71ng p27)  
262 SIVmac239. Animals were evaluated for an additional 14 weeks before euthanasia, with the  
263 exception of animal cy0690, which was sacrificed per veterinarian recommendation at 6 weeks  
264 post CD8 $\beta$ -depletion due to non-SIV-related complications.

265 Flow cytometry was used to monitor CD8 $\alpha\beta$ <sup>+</sup> T cells in PBMC and peripheral LNs of all  
266 eleven MCMs. Percent reductions in the absolute count of peripheral CD8 $\alpha\beta$ <sup>+</sup> T cells in animals  
267 that received CD8 $\beta$ 255R1 were most prominent at week 2 (median: 94%; range: 70% to 98%);  
268 CD8 $\alpha\beta$ <sup>+</sup> T cells remained significantly depleted at the time of SIVmac239 challenge (median:  
269 89%; range: 45% to 97%) through the time of necropsy (Figure 2a, blue) (Supplementary Table  
270 1). In control IgG-treated animals, the absolute counts of peripheral CD8 $\alpha\beta$ <sup>+</sup> T cells fluctuated  
271 around baseline levels for 16 weeks (Figure 2a, black). Shortly after CD8 $\beta$ 255R1 infusion, the  
272 reduction in peripheral CD8 $\alpha\beta$ <sup>+</sup> T cell count was statistically significant compared to changes in

273 the IgG control animals (data not shown). Remarkably, the absolute count of peripheral CD8 $\alpha\beta$ +  
274 T cells at 16 weeks remained depleted by an average of 64% when compared to baseline (median:  
275 67%; range: 28% to 82%) in animals that received CD8 $\beta$ 255R1. Persistent depletion of CD8 $\alpha\beta$ +  
276 T cells after administration of CD8 $\beta$ 255R1 lies in stark contrast to the reemergence of CD8 $\alpha$ +  
277 lymphocytes within 2 to 4 weeks after administration of the anti-CD8 $\alpha$  mAb cM-T807 that has  
278 been reported in other studies (8, 10, 14, 31, 40, 45-48, 53-54). Our results in both SIV-naïve and  
279 LASIV+ animals are, however, consistent with another report that observed sustained CD8 $\alpha\beta$ + T  
280 cell depletion in two SIV+ rhesus macaques that were treated with CD8 $\beta$ 255R1 and followed for  
281 approximately 18 weeks (40).

282         The extent to which CD8 $\beta$ 255R1 depletes LN CD8 $\alpha\beta$ + T cells in macaques during either  
283 chronic LASIV or pathogenic SIV infection has not yet been defined (40, 41). While technical  
284 limitations prevented the longitudinal analysis of cell populations in lymph nodes of individual  
285 LASIV+ animals, we compared the percentage of CD8 $\alpha\beta$ + T cells in the lymph nodes of animals  
286 treated with CD8 $\beta$ 255R1 to those treated with the control IgG antibody (Figure 2b). At week 3  
287 post infusion, there were threefold fewer ( $p<0.006$ ) CD8 $\alpha\beta$ + T cells as a proportion of CD3+ T  
288 cells in biopsies of axillary lymph nodes isolated from animals infused with CD8 $\beta$ 255R1 (median:  
289 4%; range: 1.9% to 20%) compared to control IgG animals (median: 27%; range: 21% to 30%).  
290 When lymph nodes were assessed 17 to 18 weeks after mAb infusion following necropsy, CD8 $\alpha\beta$ +  
291 T cell frequencies remained substantially lower in the majority of CD8 $\beta$ 255R1-treated animals  
292 compared to control IgG-treated animals (Figure 2c).

293

294 **Plasma viral load increases transiently following CD8 $\beta$ 255R1 infusion.** To determine the  
295 impact of CD8 $\beta$  depletion on control of chronic LASIV viremia we measured levels of circulating

296 virus after mAb infusion. Plasma viral load peaked 3 to 11 days after infusion with CD8 $\beta$ 255R1  
297 and was significantly increased at day 7 ( $p<0.001$ ), day 10 ( $p<0.001$ ), and day 14 ( $p=0.006$ )  
298 compared to baseline (Figure 3a). Surprisingly, at weeks 3 and 4 post infusion with CD8 $\beta$ 255R1,  
299 viral loads returned to levels that were not significantly different from baseline, despite diminished  
300 CD8 $\alpha\beta^+$  T cells in peripheral blood and LNs (Figure 2). As expected, minimal changes to  
301 peripheral CD8 $\alpha\beta^+$  T cells during the first four weeks after administration of the control IgG  
302 antibody (Figure 2) corresponded to viral loads that remained essentially unchanged (Figure 3b).

303

304 **Minimal changes to CD4 $^+$  T cells following infusion with CD8 $\beta$ 255R1.** One previously  
305 reported consequence of depletion of CD8 $\alpha^+$  cells was a corresponding increase in the frequency  
306 or activation state of CD4 $^+$  T cell populations (12, 45–47). We monitored the frequency and  
307 proliferation of peripheral CD4 $^+$  naive ( $T_N$ ), CD4 $^+$  effector memory ( $T_{EM}$ ), and CD4 $^+$  central  
308 memory ( $T_{CM}$ ) T cells following CD8 $\beta$ 255R1 infusion. Changes from baseline for both the  
309 absolute count (Figure 4a) and percent Ki-67 $^+$  cells (Figure 4b) were compared to baseline within  
310 and between each antibody-treated group. Although peripheral CD4 $^+$   $T_{EM}$  cells were significantly  
311 increased compared to baseline at two time points in the CD8 $\beta$ 255R1-treated group (Figure 4a,  
312 middle), these changes did not differ significantly when compared to animals that received control  
313 IgG (data not shown). Similarly, CD4 $^+$  T cell subpopulations exhibited minimal changes in  
314 proliferation compared to baseline within and across groups (Figure 4b and data not shown). We  
315 also compared changes in the frequency of total (Figure 4c) and percent Ki-67 $^+$  (Figure 4d) CD4 $^+$   
316 T cells in the lymph nodes isolated at 3 weeks from animals in both groups. We found that the  
317 frequency of CD4 $^+$  T cells was higher ( $p=0.029$ ; Figure 4c) in the CD8 $\beta$ 255R1-treated animals  
318 compared to control IgG animals, but that may be attributed to a lower frequency of lymph node

319 CD8 $\alpha\beta$ <sup>+</sup> T cells detected at this time (Figure 2b). The percent Ki-67<sup>+</sup> of total CD4<sup>+</sup> T cells was  
320 similar between groups at week 3 post mAb infusion (Figure 4d) (Supplementary Table 2). From  
321 these analyses, animals who received an infusion of CD8 $\beta$ 255R1 exhibited minimal changes in  
322 the number and proliferative capacity of CD4<sup>+</sup> T cells, even while plasma viremia was fluctuating.

323

### 324 **Proliferation of CD8 $\alpha\alpha$ <sup>+</sup> T cells, NK cells, and $\gamma\delta$ T cells after infusion with CD8 $\beta$ 255R1.**

325 Another consequence of using a CD8 $\alpha$ -specific mAb is the simultaneous depletion of additional  
326 cell populations that express CD8 $\alpha$ , such as CD8 $\alpha\alpha$ <sup>+</sup> T cells, NK cells, and  $\gamma\delta$  T cells (10, 12, 14,  
327 31, 40, 47, 53). Following infusion with CD8 $\beta$ 255R1, we evaluated the absolute count and percent  
328 Ki-67<sup>+</sup> of these three cell populations in the periphery. In animals that received CD8 $\beta$ 255R1, there  
329 was a rapid increase in the absolute count of CD8 $\alpha\alpha$ <sup>+</sup> T cells (median: 3.6-fold; range: 3.2-fold to  
330 3.8-fold) that differed initially from control IgG animals (Figure 5a, top) (Supplementary Table  
331 3). This was followed by increases in the percent of CD8 $\alpha\alpha$ <sup>+</sup> T cells expressing Ki-67 (median:  
332 4.5-fold; range: 4.2-fold to 5.3-fold) (Figure 5a, bottom). Control IgG-treated animals did not  
333 exhibit significant differences from baseline in the absolute count of CD8 $\alpha\alpha$ <sup>+</sup> T cells or percent  
334 that express Ki-67. Few differences were detected in the absolute count of NK cells (Figure 5b,  
335 top) or  $\gamma\delta$  T cells (Figure 5c, top) in each group or between groups for four weeks after infusion  
336 (Supplemental Table 3). In contrast, we detected significant increases from baseline in the  
337 frequency of NK cells and  $\gamma\delta$  T cells expressing Ki-67 in the group treated with CD8 $\beta$ 255R1 that  
338 peaked at approximately 7-fold (median: 4.3-fold; range: 1.8-fold to 17.7-fold) and 10-fold  
339 (median: 9.9-fold; range: 0.1-fold to 18.8-fold), respectively (Figures 5b and 5c, bottom). The  
340 observed proliferation of NK cells in the CD8 $\beta$ 255R1-treated animals was significantly greater  
341 than control IgG-treated animals at days 7, 10, and 14 (Supplementary Table 4).



342 We also evaluated changes to the frequency and proliferation of CD8 $\alpha\alpha$ + T cells (Figure  
343 5d), NK cells (Figure 5e), and  $\gamma\delta$  T cells (Figure 5f) in lymph nodes of animals treated with  
344 CD8 $\beta$ 255R1 or control IgG at week 3 post infusion (Supplementary Table 2). Similar to cells in  
345 the periphery, the frequency of CD8 $\alpha\alpha$ + T cells (Figure 5d, top), NK cells (Figure 5e, top), and  $\gamma\delta$   
346 T cells (Figure 5f, top) in lymph nodes of animals treated with CD8 $\beta$ 255R1 was comparable to  
347 control IgG animals. At week 3 after CD8 $\beta$ 255R1 infusion, the frequency of Ki67+ CD8 $\alpha\alpha$ + T  
348 cells (Figure 5d, bottom) and  $\gamma\delta$  T cells (Figure 5f, bottom) was significantly higher than that  
349 observed in control IgG animals. Taken together, our data indicate that CD8 $\alpha\alpha$ + T cells, NK cells,  
350 and  $\gamma\delta$  T cells exhibited rapid proliferation in either the PBMC or lymph nodes following  
351 CD8 $\beta$ 255R1 infusion, while their absolute cell counts remained relatively unchanged.

352

353 **Limited SIV-specific T cell responses in LNs following CD8 $\beta$ 255R1 infusion.** To determine  
354 the impact of CD8 $\beta$ 255R1 infusion on SIV-specific T cells within LNs, we performed intracellular  
355 cytokine staining (ICS) with cells isolated from LN biopsies taken three weeks after antibody  
356 infusion. Multiple pools containing overlapping peptides spanning the entire Gag protein and Env  
357 protein were used to stimulate cells, followed by staining with CD107a (Figure 6, top) and  
358 IFN $\gamma$ /TNF $\alpha$  (Figure 6, bottom) to assess degranulation and pro-inflammatory cytokine secretion,  
359 respectively. None of the animals that received the control IgG antibody exhibited remarkable  
360 SIV-specific responses. This was not surprising, as these animals did not exhibit any marked  
361 changes in viremia. We were surprised to find that three of the animals that received CD8 $\beta$ 255R1  
362 (cy0691, cy0749, and cy0752) exhibited more residual virus-specific CD8 $\alpha\beta$ + T cells than the  
363 others (Figure 6). Of note, those three animals were each infected with a LASIV that contained  
364 known immunogenic epitopes. Thus, ongoing replication of a virus with intact M3 epitopes may

365 have provided stronger antigenic stimulation to T cells and therefore driven proliferation in these  
366 three animals. The other four animals that received CD8 $\beta$ 255R1 were homozygous for the M3  
367 MHC haplotype and originally infected with a LASIV that contained point mutations in eight  
368 epitopes restricted by MHC molecules expressed by the M3 MHC haplotype (42). Even though it  
369 is likely that CD8 $\beta$ 255R1 infusion alone cannot completely eliminate virus-specific CD8 $\alpha\beta$ + T  
370 cells from lymph nodes, the combination of infecting animals with a minimally immunogenic  
371 LASIV and infusion of CD8 $\beta$ 255R1 was able to limit the frequency of Gag- and Env-specific  
372 CD8 $\beta$ + T cells at this important tissue site.

373

374 **Protection from SIVmac239 challenge during depletion of CD8 $\alpha\beta$ + T cells.** To determine  
375 whether CD8 $\beta$ 255R1 infusion increased susceptibility to infection with pathogenic SIV, we  
376 performed a high dose intravenous challenge in all 11 animals at 4 weeks post antibody infusion  
377 with SIVmac239 (55, 56). Previously, we found that 4/7 MCMs chronically infected with a  
378 minimally immunogenic LASIV were protected from intravenous challenge with the same dose of  
379 SIVmac239 (34). The 11 animals used in the current study were also chronically infected with a  
380 *nef*-deleted SIV, so discriminating qRT-PCR assays were used to differentiate previous  $\Delta$ *nef*  
381 circulating virus from full-length *nef* that was present in the challenge strain. Surprisingly, there  
382 was no replicating SIVmac239 in the plasma of six of the seven MCMs infused with CD8 $\beta$ 255R1  
383 (Figure 7a), despite depletion of peripheral CD8 $\beta$ + lymphocytes at the time of challenge (median:  
384 87%; range: 45% to 95%) (Figure 2a). Similarly, there was no replicating SIVmac239 detected in  
385 the plasma of three out of four MCMs that received the control IgG antibody (Figure 7b), despite  
386 having similar CD8 $\alpha\beta$ + T cell levels as pre-depletion (Figure 2a). It is possible that residual virus-  
387 specific CD8 $\alpha\beta$ + T cells in the lymph nodes (Figure 6) were sufficient to protect animals from

388 challenge, as others have found that virus-specific CD8<sup>+</sup> T cells in lymph nodes are an immune  
389 correlate of protection by LASIV (38). However, with so few animals becoming infected with  
390 SIVmac239 we could not determine if this was the main mechanism of protection.

391  
392 **Neutralizing antibody titers to SIVmac239 do not predict challenge outcome.** We wanted to  
393 determine whether depletion of CD8 $\beta$ <sup>+</sup> lymphocytes had a direct impact on neutralizing antibody  
394 titers, which may have contributed to protection from pathogenic SIVmac239 infection. To  
395 accomplish this, we performed *in vitro* antibody neutralization assays with plasma collected  
396 immediately before mAb infusion, as well as immediately before SIVmac239 challenge. We tested  
397 neutralization potency against SIV strains that are highly neutralization-sensitive (tier 1;  
398 SIVmac251.30 and SIVsmE660.CP3C), moderately neutralization-resistant (tier 2;  
399 SIVmac251.H9), and highly neutralization-resistant (tier 3; SIVmac239) (43). In animals that  
400 received control IgG, neutralizing antibody titers prior to infusion (Figure 8a, left) were similar to  
401 those detected prior to SIVmac239 challenge (Figure 8a, right). Similarly, we did not detect  
402 substantial changes to neutralizing antibody titers prior to CD8 $\beta$ 255R1 infusion (Figure 8b, left)  
403 when compared to the titers right before SIVmac239 challenge (Figure 8b, right). Accordingly, we  
404 could not conclude protection from challenge following infusion with CD8 $\beta$ 255R1 was a result of  
405 increased *in vitro* SIVmac239 neutralization antibody titers.

406

#### 407 **Discussion: (word count: 1,087)**

408 Studies of SIV-infected macaques using a CD8 $\alpha$ -specific mAb to deplete CD8<sup>+</sup> T cells *in*  
409 *vivo* have frequently been interpreted as evidence for a direct antiviral role of CD8<sup>+</sup> T cells in HIV  
410 infection (8, 48). However, these results are complicated by the simultaneous depletion of CD8 $\alpha$ -

411 expressing NK cells and  $\gamma\delta$  T cells (10, 14, 15, 49). Here we showed that a single intravenous  
412 infusion of the CD8 $\beta$ -specific mAb CD8 $\beta$ 255R1 selectively depleted CD8 $\alpha\beta$ + T cells in peripheral  
413 blood, though to a lesser extent in lymph nodes, from SIV-naïve and LASIV-infected cynomolgus  
414 macaques. Following depletion, we observed a transient rise in plasma viremia that was followed  
415 by re-establishment of viral control, even when CD8 $\alpha\beta$ + T cells remained depleted in the  
416 peripheral blood. During the time of prolonged peripheral CD8 $\alpha\beta$ + T cell depletion, we found that  
417 CD8 $\alpha\alpha$ + T cells, NK cells, and  $\gamma\delta$  T cells exhibited markers of proliferation regardless of changes  
418 to their total frequencies in blood. These observations demonstrated that the CD8 $\beta$ 255R1 antibody  
419 specifically depleted CD8 $\alpha\beta$ + T cells. CD8 $\beta$ 255R1 could not fully deplete CD8 $\alpha\beta$ + T cells from  
420 tissue sites, as lymph nodes contained residual CD8 $\alpha\beta$ + T cells. While our results specifically  
421 demonstrated that administration of the CD8 $\beta$ 255R1 depleting antibody led to a rise in LASIV  
422 plasma viremia, we could not conclusively determine whether the residual CD8 $\alpha\beta$ + T cells in  
423 tissues, or the persistence of CD8 $\alpha\alpha$ + T cells, NK cells, and/or  $\gamma\delta$  T cells were responsible for re-  
424 establishment of LASIV control and subsequent protection from pathogenic SIVmac239  
425 challenge. Because animals also had very low neutralizing antibody titers against SIVmac239  
426 throughout the study period, it is unlikely that protection against challenge was mediated by  
427 neutralization of the challenge virus.

428 We found that animals treated with the CD8 $\beta$ 255R1 antibody exhibited demonstrably  
429 fewer total CD8 $\alpha\beta$ + T cells in the periphery and the lymph nodes, when compared to control IgG  
430 animals. To determine if we depleted virus-specific CD8 $\alpha\beta$ + T cells, we initially performed  $\gamma$ -  
431 interferon enzyme-linked immunospot assays (IFN- $\gamma$  ELISPOT) with PBMC prior to, and three  
432 weeks after infusion with CD8 $\beta$ 255R1, but were unable to confirm if the SIV-specific responses  
433 that were detected three weeks after infusion were attributed to CD8+ T cells or CD4+ T cells

434 (data not shown). While numerous pieces of evidence point towards a critical role of CD8<sup>+</sup> T cells  
435 in long term viral control (8-10, 14, 31, 47, 53), one report suggests that virus-specific CD8<sup>+</sup> T  
436 cells in peripheral blood may not be absolutely required for control of virus replication during  
437 chronic SIV infection, even if they are needed to initially suppress viremia (57). While tetrameric  
438 reagents are an alternative method to detect virus-specific T cells, these reagents were not available  
439 for two reasons: (1) Many of the epitopes that would elicit CD8 $\alpha\beta$ <sup>+</sup> T cells were rendered non-  
440 immunogenic in the mutant LASIV used to infect several of these animals (42), and (2) tetrameric  
441 reagents specific for the CD8 and CD4 T cells that developed in the animals infected with the  
442 mutant LASIV have not been produced. We did perform intracellular cytokine staining  
443 experiments with lymph nodes that were collected three weeks after antibody infusion.  
444 Interestingly, the three animals with the largest frequency of Env-specific CD8 $\alpha\beta$ <sup>+</sup> T cells were  
445 the three animals that were originally infected with strains of LASIV containing immunogenic  
446 epitopes. Two animals were infected with wild type SIVmac239 $\Delta$ nef, and the third animal was  
447 infected with the mutant LASIV, but expressed some non-M3 MHC alleles. As a result, these three  
448 animals likely had the largest pool of virus-specific memory CD8 $\alpha\beta$ <sup>+</sup> T cells that could emerge  
449 when viremia increased. Together, our data imply that the most effective way to eliminate virus-  
450 specific CD8 $\alpha\beta$ <sup>+</sup> T cells with currently available technology is to infect animals with a virus whose  
451 T cell epitopes are rendered non-immunogenic combined with a CD8 $\beta$ -specific depleting antibody.  
452 Even with this ‘double-knockout approach’, more sophisticated reagents are needed to improve  
453 CD8 $\alpha\beta$ <sup>+</sup> T cell depletion in tissues to determine if they are required to re-establish viral control.

454 Even when we minimized the CD8 $\alpha\beta$ <sup>+</sup> T cell populations with our interventions, we were  
455 surprised to find that six out of seven animals treated with CD8 $\beta$ 255R1 were resistant to infection  
456 with pathogenic SIVmac239. This level of protection was on par with the animals treated with

457 control IgG. Unfortunately, even when we examined non-CD8 $\beta$ <sup>+</sup> immune cell populations and  
458 neutralizing antibody titers, there were no obvious immune correlates of protection. Protection  
459 afforded to LASIV has previously been associated with the presence of effector-differentiated T  
460 cell responses within the lymph node (37, 38), so it is entirely possible that the residual virus-  
461 specific T cells in the lymph nodes or tissues were sufficient to protect animals from SIVmac239  
462 challenge. Continuing to improve the methods to deplete virus-specific immune cells in the LASIV  
463 model will be needed to directly demonstrate the immune correlates of protection mediated by  
464 LASIV.

465 One unique attribute of our study was the inclusion of animals treated with an isotype-  
466 matched IgG control antibody that was absent in recent reports of CD8 $\beta$ 255R1 (40, 41). By  
467 comparing paired differences of cell populations between animals treated with CD8 $\beta$ 255R1 and  
468 control IgG, we accounted for potential artifacts that may result from infusion of a nonspecific IgG  
469 antibody. For example, increases over baseline in the percent of Ki-67<sup>+</sup> CD8 $\alpha$ <sup>+</sup> T cells detected  
470 from weeks 2 to 4 in both groups suggests that IgG infusion alone induces proliferation of CD8 $\alpha$ <sup>+</sup>  
471 T cells. Additionally, similar to a previous study using CD8 $\beta$ 255R1 (40) we observed increased  
472 numbers of circulating NK cells in animals receiving CD8 $\beta$ 255R1, though similar increases were  
473 also detected in the control IgG animals. These observations question whether changes to CD8 $\alpha$ <sup>+</sup>  
474 cell populations were a direct consequence of administration of the specific CD8 $\beta$ 255R1  
475 monoclonal antibody, or whether the administration of a control antibody was sufficient to induce  
476 this expansion. Thus, including an IgG control group in these types of antibody-infusion studies is  
477 critical for identifying non-specific depletion effects.

478 In this study, we provide a comprehensive comparison of the immunological impact that  
479 follows infusion with the anti-CD8 $\beta$  mAb CD8 $\beta$ 255R1 compared to an isotype matched control

480 IgG. The persistent depletion of peripheral CD8 $\alpha\beta$ + T cells following administration of  
481 CD8 $\beta$ 255R1 lies in stark contrast to the transient depletion of CD8 $\alpha\beta$ + T cells following infusion  
482 with a CD8 $\alpha$ -specific mAb. Unlike studies with the CD8 $\alpha$ -depleting antibody that observed  
483 regained control of virus replication coincident with rebound of CD8+ T cells, we observed  
484 regained control of viral replication, even when peripheral CD8 $\beta$ + T cells remained depleted.  
485 Moreover, protection from intravenous challenge with pathogenic SIVmac239 was achieved when  
486 CD8 $\alpha\beta$ + T cell magnitude was reduced by administration of CD8 $\beta$ 255R1 and, in some cases, in  
487 combination with a mutant LASIV that failed to elicit many virus-specific T cells (42).  
488 Nonetheless, the data we provide demonstrates that the CD8 $\beta$ 255R1 antibody can be used to  
489 specifically deplete CD8 $\alpha\beta$ + T cells, while leaving other CD8 $\alpha$ + immune cell populations intact.  
490 This may serve to be valuable in future studies evaluating the importance of CD8 $\alpha\beta$ + T cells in  
491 diverse disease models.

492

### 493 **Acknowledgements**

494 Research reported in this publication was supported in part by the Office of The Director,  
495 National Institutes of Health (NIH), under award number P51OD011106 to the Wisconsin National  
496 Primate Research Center (University of Wisconsin-Madison), as well as by the Intramural  
497 Research Program of the National Institutes of Allergy and Infectious Diseases, NIH. The research  
498 was conducted in part at a facility constructed with support from Research Facilities Improvement  
499 Program grant numbers RR15459-01 and RR020141-01. We would like to thank staff at the  
500 Wisconsin National Primate Research Center (WNPRC) for veterinary care of the animals  
501 involved in the study. Research reported in this publication was supported in part by National  
502 Institutes of Health award number R01AI108415, as well as by the National Institute of General

503 Medical Sciences of the National Institutes of Health under award number T32GM081061. The  
504 content is solely our responsibility and does not necessarily represent the official views of the  
505 National Institutes of Health. Special thanks to Keith Reimann, Afam Okoye, Mauricio Martins,  
506 and Matthew Reynolds for helpful discussions.



507 **Figure legends:**

508

509 **Figure 1: Infusion with CD8 $\beta$ 255R1 selectively depletes CD8 $\alpha\beta$ + T cells in naïve**

510 **cynomolgus macaques.** Two naïve cynomolgus macaques (A12412 and A12372) received a

511 single 50 mg/kg intravenous infusion with CD8 $\beta$ 255R1. Percent CD8 $\beta$ + T cells (top),

512 CD4+ T cells (middle), and CD16+ NK cells (bottom) in (a) peripheral blood and (b) lymph

513 nodes were measured by multicolor flow cytometry. Data are shown as mean and standard

514 deviation. Peripheral blood samples from each animal were analyzed in triplicate, while lymph

515 node samples from each animal were analyzed in duplicate.

516

517 **Figure 2: Depletion of CD8 $\alpha\beta$ + T cells during chronic LASIV infection.** (a) Absolute count of

518 CD8 $\alpha\beta$ + T cells were assessed in peripheral blood for 16 weeks following infusion with

519 CD8 $\beta$ 255R1 (blue) or control IgG (black). Percent CD8 $\alpha\beta$ + T cells from lymph node biopsies at

520 (b) 3 weeks post-infusion and (c) at necropsy (week 17-18). Data are represented as mean and

521 standard error of the mean. \*Data shown include four IgG-treated animals and seven CD8 $\beta$ 255R1-

522 treated animals through week 6, at which point six CD8 $\beta$ 255R1-treated animals are shown for the

523 remainder of the study due to one animal (cy0690) requiring early euthanasia.

524

525 **Figure 3: Regained control of viral recrudescence following depletion of peripheral CD8 $\alpha\beta$ +**

526 **T cells.** Plasma viral load was measured for four weeks after mAb infusion. (a) Viral load initially

527 increased following infusion with CD8 $\beta$ 255R1, but returned to pre-depletion levels by day 18. (b)

528 Viral load did not change significantly in animals that received control IgG. The limit of detection

529 of the plasma viral load assay (100 vRNA copies/mL) is shown with a horizontal dashed line.

530

531 **Figure 4: Minimal changes in the frequency and proliferation of CD4+ T cell populations**

532 **following administration of CD8 $\beta$ 255R1.** Absolute cell count and percent Ki-67+ of CD4+ T

533 cells from peripheral blood and lymph nodes were measured by multicolor flow cytometry for 4

534 weeks following mAb infusion. Within peripheral blood, individual time points represent mean  $\pm$

535 SEM for animals that received CD8 $\beta$ 255R1 (blue) or control IgG (black) and open circles

536 represent a significant ( $p < 0.05$ ) change from baseline. (a) Absolute cell count and (b) percent Ki-

537 67+ of naive (left), effector memory (middle), and central memory (right) CD4+ T cells in

538 peripheral blood. Within the lymph nodes, individual animals are represented by a unique symbol

539 and red text represents a significant difference between groups. (c) Percent CD4+ T cells of CD3+

540 T cells and (d) percent Ki-67+ of CD4+ T cells from axillary lymph nodes biopsied at week 3 post

541 mAb infusion.

542

543 **Figure 5: Proliferation of CD8 $\alpha\alpha$ +, NK cells, and  $\gamma\delta$  T cells in peripheral blood following**

544 **infusion with CD8 $\beta$ 255R1.** Absolute cell count and percent Ki-67+ of CD8 $\alpha$ + lymphocytes from

545 peripheral blood and lymph nodes were measured by multicolor flow cytometry for 4 weeks after

546 infusion with CD8 $\beta$ 255R1 (blue) or control IgG (black). Within peripheral blood, individual time

547 points represent mean  $\pm$  SEM for animals and open circles represent a significant change from

548 baseline. Absolute count (top) and percent Ki-67+ (bottom) of (a) CD8 $\alpha\alpha$ + T cells, (b) NK cells,

549 and (c)  $\gamma\delta$  T cells in peripheral blood. Within the lymph nodes, individual animals are represented

550 by a unique symbol and red text represents a significant difference between groups. (d) Percent

551 CD8 $\alpha\alpha$ + T cells of CD3+ lymphocytes (top) and percent Ki-67+ CD8 $\alpha\alpha$ + T cells (bottom) in

552 lymph nodes. (e) Percent NK cells of CD3- lymphocytes (top) and percent Ki-67+ NK cells

553 (bottom) in lymph nodes. (f) Percent  $\gamma\delta$  T cells of CD3+ lymphocytes (top) and percent Ki-67+  $\gamma\delta$   
554 T cells (bottom) in lymph nodes.

555

556 **Figure 6: Env-specific antiviral responses in lymph nodes following infusion with**  
557 **CD8 $\beta$ 255R1.** At 3 weeks post-infusion we performed intracellular cytokine staining to assess Gag-  
558 specific and Env-specific responses from lymph node biopsies for (a) CD8 $\alpha\beta$ + T cells, (b) CD8 $\alpha\alpha$ +  
559 T cells, and (c) CD4+ T cells. We assessed degranulation (CD107a, top) and pro-inflammatory  
560 cytokine secretion (IFN $\gamma$  and TNF $\alpha$ , bottom) for seven animals infused with CD8 $\beta$ 255R1 (blue)  
561 and four animals infused with IgG1 control (black). Both single and double positive responses  
562 were included as % IFN $\gamma$ +TNF $\alpha$ +. Symbols represent individual animals.

563

564 **Figure 7: Protection from intravenous SIVmac239 challenge following infusion with**  
565 **CD8 $\beta$ 255R1.** Four weeks after infusion with CD8 $\beta$ 255R1 or control IgG, animals were challenged  
566 intravenously with SIVmac239. Viral load assays were performed for full-length *nef* (red, closed)  
567 and  $\Delta$ *nef* (red, open) at the indicated time points for each animal and graphed in the context of  
568 absolute CD8 $\alpha\beta$ + T cell count (black). The limit of detection for the assay (100 vRNA copies/mL)  
569 is represented by a horizontal red dotted line. Animal IDs highlighted in red became infected  
570 following SIVmac239 challenge. \*cy0690 required necropsy at week 6 following CD8 $\beta$ 255R1  
571 infusion.

572

573 **Figure 8. Plasma neutralization potency *in vitro* is not predictive of protection from challenge**  
574 ***in vivo*.** Plasma samples collected immediately before mAb infusion and 4 weeks later immediately  
575 before intravenous SIVmac239 challenge were used to test antibody neutralization potency against

576 select tier 1 (SIVmac239.H9, SIVsmE660.CP3C), tier 2 (SIVmac251.30), and tier 3 (SIVmac239)  
577 viruses. Neutralizing antibody titers were measured (a) prior to infusion with control IgG and (b)  
578 SIVmac239 challenge. Neutralizing antibody titers were measured (c) prior to infusion with  
579 CD8 $\beta$ 255R1 and (d) SIVmac239 challenge. Titers are shown as 50% inhibitory dilution (ID50).  
580 Animals that became infected following SIVmac239 challenge are highlighted in red.

581

## 582 References

- 583 1. Koup, R. A., J. T. Safrit, Y. Cao, C. A. Andrews, G. McLeod, W. Borkowsky, C. Farthing,  
584 and D. D. Ho. 1994. Temporal association of cellular immune responses with the initial  
585 control of viremia in primary human immunodeficiency virus type 1 syndrome. *J Virol* 68:  
586 4650-4655.
- 587 2. Borrow, P., H. Lewicki, B. H. Hahn, G. M. Shaw, and M. B. Oldstone. 1994. Virus-  
588 specific CD8+ cytotoxic T-lymphocyte activity associated with control of viremia in  
589 primary human immunodeficiency virus type 1 infection. *J Virol* 68: 6103-6110.
- 590 3. Walker, C. M., D. J. Moody, D. P. Stites, and J. A. Levy. 1986. CD8+ lymphocytes can  
591 control HIV infection in vitro by suppressing virus replication. *Science* 234: 1563-1566.
- 592 4. Gauduin, M. C., R. L. Glickman, R. Means, and R. P. Johnson. 1998. Inhibition of simian  
593 immunodeficiency virus (SIV) replication by CD8(+) T lymphocytes from macaques  
594 immunized with live attenuated SIV. *J Virol* 72: 6315-6324.
- 595 5. Mutua, G., B. Farah, R. Langat, J. Indangasi, S. Ogola, B. Onsembe, J. T. Kopycinski, P.  
596 Hayes, N. J. Borthwick, A. Ashraf, L. Dally, B. Barin, A. Tillander, J. Gilmour, J. De Bont,  
597 A. Crook, D. Hannaman, J. H. Cox, O. Anzala, P. E. Fast, M. Reilly, K. Chinyenze, W.  
598 Jaoko, T. Hanke, and T. Hiv-Core 004 Study Group. 2016. Broad HIV-1 inhibition in vitro  
599 by vaccine-elicited CD8(+) T cells in African adults. *Mol Ther Methods Clin Dev* 3: 16061.
- 600 6. Liu, Y., J. P. McNevin, S. Holte, M. J. McElrath, and J. I. Mullins. 2011. Dynamics of viral  
601 evolution and CTL responses in HIV-1 infection. *PLoS One* 6: e15639.
- 602 7. McMichael, A. J., and S. L. Rowland-Jones. 2001. Cellular immune responses to HIV.  
603 *Nature* 410: 980-987.
- 604 8. Schmitz, J. E., M. J. Kuroda, S. Santra, V. G. Sasseville, M. A. Simon, M. A. Lifton, P.  
605 Racz, K. Tenner-Racz, M. Dalesandro, B. J. Scallon, J. Ghayeb, M. A. Forman, D. C.  
606 Montefiori, E. P. Rieber, N. L. Letvin, and K. A. Reimann. 1999. Control of viremia in  
607 simian immunodeficiency virus infection by CD8+ lymphocytes. *Science* 283: 857-860.
- 608 9. Jin, X., D. E. Bauer, S. E. Tuttleton, S. Lewin, A. Gettie, J. Blanchard, C. E. Irwin, J. T.  
609 Safrit, J. Mittler, L. Weinberger, L. G. Kostrikis, L. Zhang, A. S. Perelson, and D. D. Ho.  
610 1999. Dramatic rise in plasma viremia after CD8(+) T cell depletion in simian  
611 immunodeficiency virus-infected macaques. *J Exp Med* 189: 991-998.
- 612 10. Metzner, K. J., X. Jin, F. V. Lee, A. Gettie, D. E. Bauer, M. Di Mascio, A. S. Perelson, P.  
613 A. Marx, D. D. Ho, L. G. Kostrikis, and R. I. Connor. 2000. Effects of in vivo CD8(+) T

- 614 cell depletion on virus replication in rhesus macaques immunized with a live, attenuated  
615 simian immunodeficiency virus vaccine. *J Exp Med* 191: 1921-1931.
- 616 11. Wong, J. K., M. C. Strain, R. Porrata, E. Reay, S. Sankaran-Walters, C. C. Ignacio, T.  
617 Russell, S. K. Pillai, D. J. Looney, and S. Dandekar. 2010. In vivo CD8+ T-cell  
618 suppression of siv viremia is not mediated by CTL clearance of productively infected cells.  
619 *PLoS Pathog* 6: e1000748.
- 620 12. Cartwright, E. K., L. Spicer, S. A. Smith, D. Lee, R. Fast, S. Paganini, B. O. Lawson, M.  
621 Nega, K. Easley, J. E. Schmitz, S. E. Bosinger, M. Paiardini, A. Chahroudi, T. H.  
622 Vanderford, J. D. Estes, J. D. Lifson, C. A. Derdeyn, and G. Silvestri. 2016. CD8(+)  
623 Lymphocytes Are Required for Maintaining Viral Suppression in SIV-Infected Macaques  
624 Treated with Short-Term Antiretroviral Therapy. *Immunity* 45: 656-668.
- 625 13. Magalhaes, I., N. K. Vudattu, R. K. Ahmed, S. Kühlmann-Berenzon, Y. Ngo, D. R.  
626 Sizemore, L. Wehlin, F. Weichold, J. Andersson, Y. A. Skeiky, J. Sadoff, H. Gaines, R.  
627 Thorstensson, M. Spångberg, and M. J. Maeurer. 2010. High content cellular immune  
628 profiling reveals differences between rhesus monkeys and men. *Immunology* 131: 128-140.
- 629 14. Friedrich, T. C., L. E. Valentine, L. J. Yant, E. G. Rakasz, S. M. Piaskowski, J. R. Furlott,  
630 K. L. Weisgrau, B. Burwitz, G. E. May, E. J. León, T. Soma, G. Napoe, S. V. Capuano, N.  
631 A. Wilson, and D. I. Watkins. 2007. Subdominant CD8+ T-cell responses are involved in  
632 durable control of AIDS virus replication. *J Virol* 81: 3465-3476.
- 633 15. Terry, L. A., J. P. DiSanto, T. N. Small, and N. Flomenberg. 1990. Differential expression  
634 and regulation of the human CD8 alpha and CD8 beta chains. *Tissue Antigens* 35: 82-91.
- 635 16. Gan, Y. H., C. D. Pauza, and M. Malkovsky. 1995. Gamma delta T cells in rhesus monkeys  
636 and their response to simian immunodeficiency virus (SIV) infection. *Clin Exp Immunol*  
637 102: 251-255.
- 638 17. Kosub, D. A., G. Lehrman, J. M. Milush, D. Zhou, E. Chacko, A. Leone, S. Gordon, G.  
639 Silvestri, J. G. Else, P. Keiser, M. K. Jain, and D. L. Sodora. 2008. Gamma/Delta T-cell  
640 functional responses differ after pathogenic human immunodeficiency virus and  
641 nonpathogenic simian immunodeficiency virus infections. *J Virol* 82: 1155-1165.
- 642 18. Webster, R. L., and R. P. Johnson. 2005. Delineation of multiple subpopulations of natural  
643 killer cells in rhesus macaques. *Immunology* 115: 206-214.
- 644 19. Marras, F., E. Nicco, F. Bozzano, A. Di Biagio, C. Dentone, E. Pontali, S. Boni, M. Setti,  
645 G. Orofino, E. Mantia, V. Bartolacci, F. Bisio, A. Riva, R. Biassoni, L. Moretta, and A. De  
646 Maria. 2013. Natural killer cells in HIV controller patients express an activated effector  
647 phenotype and do not up-regulate NKp44 on IL-2 stimulation. *Proc Natl Acad Sci U S A*  
648 110: 11970-11975.
- 649 20. Reeves, R. K., H. Li, S. Jost, E. Blass, H. Li, J. L. Schafer, V. Varner, C. Manickam, L.  
650 Eslamizar, M. Altfeld, U. H. von Andrian, and D. H. Barouch. 2015. Antigen-specific NK  
651 cell memory in rhesus macaques. *Nat Immunol* 16: 927-932.
- 652 21. Lawand, M., J. Déchanet-Merville, and M. C. Dieu-Nosjean. 2017. Key Features of  
653 Gamma-Delta T-Cell Subsets in Human Diseases and Their Immunotherapeutic  
654 Implications. *Front Immunol* 8: 761.
- 655 22. Meresse, B., and N. Cerf-Bensussan. 2009. Innate T cell responses in human gut. *Semin*  
656 *Immunol* 21: 121-129.
- 657 23. Poccia, F., L. Battistini, B. Cipriani, G. Mancino, F. Martini, M. L. Gougeon, and V.  
658 Colizzi. 1999. Phosphoantigen-reactive Vgamma9Vdelta2 T lymphocytes suppress in vitro

- 659 human immunodeficiency virus type 1 replication by cell-released antiviral factors  
660 including CC chemokines. *J Infect Dis* 180: 858-861.
- 661 24. Poonia, B., and C. D. Pauza. 2012. Gamma delta T cells from HIV+ donors can be  
662 expanded in vitro by zoledronate/interleukin-2 to become cytotoxic effectors for antibody-  
663 dependent cellular cytotoxicity. *Cytotherapy* 14: 173-181.
- 664 25. Gan, Y. H., and M. Malkovsky. 1996. Mechanisms of simian gamma delta T cell  
665 cytotoxicity against tumor and immunodeficiency virus-infected cells. *Immunol Lett* 49:  
666 191-196.
- 667 26. Tuero, I., D. Venzon, and M. Robert-Guroff. 2016. Mucosal and Systemic  $\gamma\delta$ + T Cells  
668 Associated with Control of Simian Immunodeficiency Virus Infection. *J Immunol* 197:  
669 4686-4695.
- 670 27. International, H. I. V. C. S., F. Pereyra, X. Jia, P. J. McLaren, A. Telenti, P. I. de Bakker,  
671 B. D. Walker, S. Ripke, C. J. Brumme, S. L. Pulit, M. Carrington, C. M. Kadie, J. M.  
672 Carlson, D. Heckerman, R. R. Graham, R. M. Plenge, S. G. Deeks, L. Gianniny, G.  
673 Crawford, J. Sullivan, E. Gonzalez, L. Davies, A. Camargo, J. M. Moore, N. Beattie, S.  
674 Gupta, A. Crenshaw, N. P. Burt, C. Guiducci, N. Gupta, X. Gao, Y. Qi, Y. Yuki, A.  
675 Piechocka-Trocha, E. Cutrell, R. Rosenberg, K. L. Moss, P. Lemay, J. O'Leary, T.  
676 Schaefer, P. Verma, I. Toth, B. Block, B. Baker, A. Rothchild, J. Lian, J. Proudfoot, D. M.  
677 Alvino, S. Vine, M. M. Addo, T. M. Allen, M. Altfeld, M. R. Henn, S. Le Gall, H. Streeck,  
678 D. W. Haas, D. R. Kuritzkes, G. K. Robbins, R. W. Shafer, R. M. Gulick, C. M. Shikuma,  
679 R. Haubrich, S. Riddler, P. E. Sax, E. S. Daar, H. J. Ribaldo, B. Agan, S. Agarwal, R. L.  
680 Ahern, B. L. Allen, S. Altidor, E. L. Altschuler, S. Ambardar, K. Anastos, B. Anderson, V.  
681 Anderson, U. Andrad, D. Antoniskis, D. Bangsberg, D. Barbaro, W. Barrie, J. Bartczak,  
682 S. Barton, P. Basden, N. Basgoz, S. Bazner, N. C. Bellos, A. M. Benson, J. Berger, N. F.  
683 Bernard, A. M. Bernard, C. Birch, S. J. Bodner, R. K. Bolan, E. T. Boudreaux, M. Bradley,  
684 J. F. Braun, J. E. Brndjar, S. J. Brown, K. Brown, S. T. Brown, J. Burack, L. M. Bush, V.  
685 Cafaro, O. Campbell, J. Campbell, R. H. Carlson, J. K. Carmichael, K. K. Casey, C.  
686 Cavacuiti, G. Celestin, S. T. Chambers, N. Chez, L. M. Chirch, P. J. Cimoch, D. Cohen, L.  
687 E. Cohn, B. Conway, D. A. Cooper, B. Cornelson, D. T. Cox, M. V. Cristofano, G.  
688 Cuchural, J. L. Czartoski, J. M. Dahman, J. S. Daly, B. T. Davis, K. Davis, S. M. Davod, E.  
689 DeJesus, C. A. Dietz, E. Dunham, M. E. Dunn, T. B. Ellerin, J. J. Eron, J. J. Fangman, C.  
690 E. Farel, H. Ferlazzo, S. Fidler, A. Fleenor-Ford, R. Frankel, K. A. Freedberg, N. K.  
691 French, J. D. Fuchs, J. D. Fuller, J. Gaberman, J. E. Gallant, R. T. Gandhi, E. Garcia, D.  
692 Garmon, J. C. Gathe, C. R. Gaultier, W. Gebre, F. D. Gilman, I. Gilson, P. A. Goepfert, M.  
693 S. Gottlieb, C. Goulston, R. K. Groger, T. D. Gurley, S. Haber, R. Hardwicke, W. D.  
694 Hardy, P. R. Harrigan, T. N. Hawkins, S. Heath, F. M. Hecht, W. K. Henry, M. Hladek, R.  
695 P. Hoffman, J. M. Horton, R. K. Hsu, G. D. Huhn, P. Hunt, M. J. Hupert, M. L. Illeman, H.  
696 Jaeger, R. M. Jellinger, M. John, J. A. Johnson, K. L. Johnson, H. Johnson, K. Johnson, J.  
697 Joly, W. C. Jordan, C. A. Kauffman, H. Khanlou, R. K. Killian, A. Y. Kim, D. D. Kim, C.  
698 A. Kinder, J. T. Kirchner, L. Kogelman, E. M. Kojic, P. T. Korthuis, W. Kurisu, D. S.  
699 Kwon, M. LaMar, H. Lampiris, M. Lanzafame, M. M. Lederman, D. M. Lee, J. M. Lee, M.  
700 J. Lee, E. T. Lee, J. Lemoine, J. A. Levy, J. M. Llibre, M. A. Liguori, S. J. Little, A. Y. Liu,  
701 A. J. Lopez, M. R. Loutfy, D. Loy, D. Y. Mohammed, A. Man, M. K. Mansour, V. C.  
702 Marconi, M. Markowitz, R. Marques, J. N. Martin, H. L. Martin, K. H. Mayer, M. J.  
703 McElrath, T. A. McGhee, B. H. McGovern, K. McGowan, D. McIntyre, G. X. Mcleod, P.  
704 Menezes, G. Mesa, C. E. Metroka, D. Meyer-Olson, A. O. Miller, K. Montgomery, K. C.

- 705 Mounzer, E. H. Nagami, I. Nagin, R. G. Nahass, M. O. Nelson, C. Nielsen, D. L. Norene,  
706 D. H. O'Connor, B. O. Ojikutu, J. Okulicz, O. O. Oladehin, E. C. Oldfield, S. A. Olender,  
707 M. Ostrowski, W. F. Owen, E. Pae, J. Parsonnet, A. M. Pavlatos, A. M. Perlmutter, M. N.  
708 Pierce, J. M. Pincus, L. Pisani, L. J. Price, L. Proia, R. C. Prokesch, H. C. Pujet, M.  
709 Ramgopal, A. Rathod, M. Rausch, J. Ravishankar, F. S. Rhame, C. S. Richards, D. D.  
710 Richman, B. Rodes, M. Rodriguez, R. C. Rose, E. S. Rosenberg, D. Rosenthal, P. E. Ross,  
711 D. S. Rubin, E. Rumbaugh, L. Saenz, M. R. Salvaggio, W. C. Sanchez, V. M. Sanjana, S.  
712 Santiago, W. Schmidt, H. Schuitemaker, P. M. Sestak, P. Shalit, W. Shay, V. N. Shirvani,  
713 V. I. Silebi, J. M. Sizemore, P. R. Skolnik, M. Sokol-Anderson, J. M. Sosman, P. Stabile, J.  
714 T. Stapleton, S. Starrett, F. Stein, H. J. Stellbrink, F. L. Serman, V. E. Stone, D. R. Stone,  
715 G. Tambussi, R. A. Taplitz, E. M. Tedaldi, A. Telenti, W. Theisen, R. Torres, L. Tosiello,  
716 C. Tremblay, M. A. Tribble, P. D. Trinh, A. Tsao, P. Ueda, A. Vaccaro, E. Valadas, T. J.  
717 Vanig, I. Vecino, V. M. Vega, W. Veikley, B. H. Wade, C. Walworth, C. Wanidworanun,  
718 D. J. Ward, D. A. Warner, R. D. Weber, D. Webster, S. Weis, D. A. Wheeler, D. J. White,  
719 E. Wilkins, A. Winston, C. G. Wlodaver, A. van't Wout, D. P. Wright, O. O. Yang, D. L.  
720 Yurdin, B. W. Zabukovic, K. C. Zachary, B. Zeeman, and M. Zhao. 2010. The major  
721 genetic determinants of HIV-1 control affect HLA class I peptide presentation. *Science*  
722 330: 1551-1557.
- 723 28. Loffredo, J. T., J. Sidney, A. T. Bean, D. R. Beal, W. Bardet, A. Wahl, O. E. Hawkins, S.  
724 Piaskowski, N. A. Wilson, W. H. Hildebrand, D. I. Watkins, and A. Sette. 2009. Two MHC  
725 class I molecules associated with elite control of immunodeficiency virus replication,  
726 Mamu-B\*08 and HLA-B\*2705, bind peptides with sequence similarity. *J Immunol* 182:  
727 7763-7775.
- 728 29. Yant, L. J., T. C. Friedrich, R. C. Johnson, G. E. May, N. J. Maness, A. M. Enz, J. D.  
729 Lifson, D. H. O'Connor, M. Carrington, and D. I. Watkins. 2006. The high-frequency  
730 major histocompatibility complex class I allele Mamu-B\*17 is associated with control of  
731 simian immunodeficiency virus SIVmac239 replication. *J Virol* 80: 5074-5077.
- 732 30. Harris, M., C. M. Burns, E. A. Becker, A. T. Braasch, E. Gostick, R. C. Johnson, K. W.  
733 Broman, D. A. Price, T. C. Friedrich, and S. L. O'Connor. 2013. Acute-phase CD8 T cell  
734 responses that select for escape variants are needed to control live attenuated simian  
735 immunodeficiency virus. *J Virol* 87: 9353-9364.
- 736 31. Reynolds, M. R., A. M. Weiler, K. L. Weisgrau, S. M. Piaskowski, J. R. Furlott, J. T.  
737 Weinfurter, M. Kaizu, T. Soma, E. J. León, C. MacNair, D. P. Leaman, M. B. Zwick, E.  
738 Gostick, S. K. Musani, D. A. Price, T. C. Friedrich, E. G. Rakasz, N. A. Wilson, A. B.  
739 McDermott, R. Boyle, D. B. Allison, D. R. Burton, W. C. Koff, and D. I. Watkins. 2008.  
740 Macaques vaccinated with live-attenuated SIV control replication of heterologous virus. *J*  
741 *Exp Med* 205: 2537-2550.
- 742 32. Daniel, M. D., F. Kirchhoff, S. C. Czajak, P. K. Sehgal, and R. C. Desrosiers. 1992.  
743 Protective effects of a live attenuated SIV vaccine with a deletion in the nef gene. *Science*  
744 258: 1938-1941.
- 745 33. Koff, W. C., P. R. Johnson, D. I. Watkins, D. R. Burton, J. D. Lifson, K. J. Hasenkrug, A.  
746 B. McDermott, A. Schultz, T. J. Zamb, R. Boyle, and R. C. Desrosiers. 2006. HIV vaccine  
747 design: insights from live attenuated SIV vaccines. *Nat Immunol* 7: 19-23.
- 748 34. Sutton, M. S., C. M. Burns, A. M. Weiler, A. J. Balgeman, A. Braasch, G. Lehrer-Brey, T.  
749 C. Friedrich, and S. L. O'Connor. 2016. Vaccination with Live Attenuated Simian

- 750 Immunodeficiency Virus (SIV) Protects from Mucosal, but Not Necessarily Intravenous,  
751 Challenge with a Minimally Heterologous SIV. *J Virol* 90: 5541-5548.
- 752 35. Alpert, M. D., J. D. Harvey, W. A. Lauer, R. K. Reeves, M. Piatak, A. Carville, K. G.  
753 Mansfield, J. D. Lifson, W. Li, R. C. Desrosiers, R. P. Johnson, and D. T. Evans. 2012.  
754 ADCC develops over time during persistent infection with live-attenuated SIV and is  
755 associated with complete protection against SIV(mac)251 challenge. *PLoS Pathog* 8:  
756 e1002890.
- 757 36. Li, Q., M. Zeng, L. Duan, J. E. Voss, A. J. Smith, S. Pambuccian, L. Shang, S. Wietgreffe,  
758 P. J. Southern, C. S. Reilly, P. J. Skinner, M. L. Zupancic, J. V. Carlis, M. Piatak, D.  
759 Waterman, R. K. Reeves, K. Masek-Hammerman, C. A. Derdeyn, M. D. Alpert, D. T.  
760 Evans, H. Kohler, S. Müller, J. Robinson, J. D. Lifson, D. R. Burton, R. P. Johnson, and A.  
761 T. Haase. 2014. Live simian immunodeficiency virus vaccine correlate of protection: local  
762 antibody production and concentration on the path of virus entry. *J Immunol* 193: 3113-  
763 3125.
- 764 37. Adnan, S., A. D. Colantonio, Y. Yu, J. Gillis, F. E. Wong, E. A. Becker, M. Piatak, R. K.  
765 Reeves, J. D. Lifson, S. L. O'Connor, and R. P. Johnson. 2015. CD8 T cell response  
766 maturation defined by anentropic specificity and repertoire depth correlates with SIV $\Delta$ nef-  
767 induced protection. *PLoS Pathog* 11: e1004633.
- 768 38. Fukazawa, Y., H. Park, M. J. Cameron, F. Lefebvre, R. Lum, N. Coombes, E. Mahyari, S.  
769 I. Hagen, J. Y. Bae, M. D. Reyes, T. Swanson, A. W. Legasse, A. Sylwester, S. G. Hansen,  
770 A. T. Smith, P. Stafova, R. Shoemaker, Y. Li, K. Oswald, M. K. Axthelm, A. McDermott,  
771 G. Ferrari, D. C. Montefiori, P. T. Edlefsen, M. Piatak, J. D. Lifson, R. P. Sékaly, and L. J.  
772 Picker. 2012. Lymph node T cell responses predict the efficacy of live attenuated SIV  
773 vaccines. *Nat Med* 18: 1673-1681.
- 774 39. Zeng, M., A. J. Smith, L. Shang, S. W. Wietgreffe, J. E. Voss, J. V. Carlis, Q. Li, M. Piatak,  
775 J. D. Lifson, R. P. Johnson, and A. T. Haase. 2016. Mucosal Humoral Immune Response to  
776 SIVmac239 $\Delta$ nef Vaccination and Vaginal Challenge. *J Immunol* 196: 2809-2818.
- 777 40. Martins, M. A., D. C. Tully, Y. C. Shin, L. Gonzalez-Nieto, K. L. Weisgrau, D. J. Bean, R.  
778 Gadgil, M. J. Gutman, A. Domingues, H. S. Maxwell, D. M. Magnani, M. Ricciardi, N.  
779 Pedreño-Lopez, V. Bailey, M. A. Cruz, N. S. Lima, M. C. Bonaldo, J. D. Altman, E.  
780 Rakasz, S. Capuano, K. A. Reimann, M. Piatak, J. D. Lifson, R. C. Desrosiers, T. M. Allen,  
781 and D. I. Watkins. 2017. Rare Control of SIVmac239 Infection in a Vaccinated Rhesus  
782 Macaque. *AIDS Res Hum Retroviruses* 33: 843-858.
- 783 41. Nishimura, Y., R. Gautam, T. W. Chun, R. Sadjadpour, K. E. Foulds, M. Shingai, F. Klein,  
784 A. Gazumyan, J. Golijanin, M. Donaldson, O. K. Donau, R. J. Plishka, A. Buckler-White,  
785 M. S. Seaman, J. D. Lifson, R. A. Koup, A. S. Fauci, M. C. Nussenzweig, and M. A.  
786 Martin. 2017. Early antibody therapy can induce long-lasting immunity to SHIV. *Nature*  
787 543: 559-563.
- 788 42. Sutton, M. S., A. Ellis-Connell, R. V. Moriarty, A. J. Balgeman, D. Gellerup, G. Barry, A.  
789 M. Weiler, T. C. Friedrich, and S. L. O'Connor. 2018. Acute-phase CD4+ T cell responses  
790 targeting invariant viral regions are associated with control of live-attenuated simian  
791 immunodeficiency virus. *J Virol*
- 792 43. Mason, R. D., H. C. Welles, C. Adams, B. K. Chakrabarti, J. Gorman, T. Zhou, R. Nguyen,  
793 S. O'Dell, S. Lusvardi, C. A. Bewley, H. Li, G. M. Shaw, Z. Sheng, L. Shapiro, R. Wyatt,  
794 P. D. Kwong, J. R. Mascola, and M. Roederer. 2016. Targeted Isolation of Antibodies  
795 Directed against Major Sites of SIV Env Vulnerability. *PLoS Pathog* 12: e1005537.



- 796 44. R CORE TEAM, R. R: A language and environment for statistical computing. 2014 R  
797 Foundation for Statistical Computing, Viena, Áustria. *Google Scholar*
- 798 45. Okoye, A., H. Park, M. Rohankhedkar, L. Coyne-Johnson, R. Lum, J. M. Walker, S. L.  
799 Planer, A. W. Legasse, A. W. Sylwester, M. Piatak, J. D. Lifson, D. L. Sodora, F. Villinger,  
800 M. K. Axthelm, J. E. Schmitz, and L. J. Picker. 2009. Profound CD4+/CCR5+ T cell  
801 expansion is induced by CD8+ lymphocyte depletion but does not account for accelerated  
802 SIV pathogenesis. *J Exp Med* 206: 1575-1588.
- 803 46. Mueller, Y. M., D. H. Do, J. D. Boyer, M. Kader, J. J. Mattapallil, M. G. Lewis, D. B.  
804 Weiner, and P. D. Katsikis. 2009. CD8+ cell depletion of SHIV89.6P-infected macaques  
805 induces CD4+ T cell proliferation that contributes to increased viral loads. *J Immunol* 183:  
806 5006-5012.
- 807 47. Klatt, N. R., E. Shudo, A. M. Ortiz, J. C. Engram, M. Paiardini, B. Lawson, M. D. Miller,  
808 J. Else, I. Pandrea, J. D. Estes, C. Apetrei, J. E. Schmitz, R. M. Ribeiro, A. S. Perelson, and  
809 G. Silvestri. 2010. CD8+ lymphocytes control viral replication in SIVmac239-infected  
810 rhesus macaques without decreasing the lifespan of productively infected cells. *PLoS*  
811 *Pathog* 6: e1000747.
- 812 48. Matano, T., R. Shibata, C. Siemon, M. Connors, H. C. Lane, and M. A. Martin. 1998.  
813 Administration of an anti-CD8 monoclonal antibody interferes with the clearance of  
814 chimeric simian/human immunodeficiency virus during primary infections of rhesus  
815 macaques. *J Virol* 72: 164-169.
- 816 49. Baume, D. M., M. A. Caligiuri, T. J. Manley, J. F. Daley, and J. Ritz. 1990. Differential  
817 expression of CD8 alpha and CD8 beta associated with MHC-restricted and non-MHC-  
818 restricted cytolytic effector cells. *Cell Immunol* 131: 352-365.
- 819 50. Bonneville, M., R. L. O'Brien, and W. K. Born. 2010. Gammadelta T cell effector  
820 functions: a blend of innate programming and acquired plasticity. *Nat Rev Immunol* 10:  
821 467-478.
- 822 51. Trinchieri, G. 1989. Biology of natural killer cells. *Adv Immunol* 47: 187-376.
- 823 52. Schmitz, J. E., M. A. Forman, M. A. Lifton, O. Concepción, K. A. Reimann, C. S.  
824 Crumpacker, J. F. Daley, R. S. Gelman, and N. L. Letvin. 1998. Expression of the  
825 CD8alpha beta-heterodimer on CD8(+) T lymphocytes in peripheral blood lymphocytes of  
826 human immunodeficiency virus- and human immunodeficiency virus+ individuals. *Blood*  
827 92: 198-206.
- 828 53. Schmitz, J. E., M. A. Simon, M. J. Kuroda, M. A. Lifton, M. W. Ollert, C. W. Vogel, P.  
829 Racz, K. Tenner-Racz, B. J. Scallon, M. Dalesandro, J. Ghayeb, E. P. Rieber, V. G.  
830 Sasseville, and K. A. Reimann. 1999. A nonhuman primate model for the selective  
831 elimination of CD8+ lymphocytes using a mouse-human chimeric monoclonal antibody.  
832 *Am J Pathol* 154: 1923-1932.
- 833 54. Schmitz, J. E., R. P. Johnson, H. M. McClure, K. H. Manson, M. S. Wyand, M. J. Kuroda,  
834 M. A. Lifton, R. S. Khunhkhun, K. J. McEvers, J. Gillis, M. Piatak, J. D. Lifson, G.  
835 Grosschupff, P. Racz, K. Tenner-Racz, E. P. Rieber, K. Kuus-Reichel, R. S. Gelman, N. L.  
836 Letvin, D. C. Montefiori, R. M. Ruprecht, R. C. Desrosiers, and K. A. Reimann. 2005.  
837 Effect of CD8+ lymphocyte depletion on virus containment after simian immunodeficiency  
838 virus SIVmac251 challenge of live attenuated SIVmac239delta3-vaccinated rhesus  
839 macaques. *J Virol* 79: 8131-8141.

- 840 55. Mansfield, K., S. M. Lang, M. C. Gauduin, H. B. Sanford, J. D. Lifson, R. P. Johnson, and  
841 R. C. Desrosiers. 2008. Vaccine protection by live, attenuated simian immunodeficiency  
842 virus in the absence of high-titer antibody responses and high-frequency cellular immune  
843 responses measurable in the periphery. *J Virol* 82: 4135-4148.
- 844 56. Evans, D. T., J. E. Bricker, H. B. Sanford, S. Lang, A. Carville, B. A. Richardson, M.  
845 Piatak, J. D. Lifson, K. G. Mansfield, and R. C. Desrosiers. 2005. Immunization of  
846 macaques with single-cycle simian immunodeficiency virus (SIV) stimulates diverse virus-  
847 specific immune responses and reduces viral loads after challenge with SIVmac239. *J*  
848 *Virol* 79: 7707-7720.
- 849 57. Bruel, T., C. Hamimi, N. Dereuddre-Bosquet, A. Cosma, S. Y. Shin, A. Corneau, P.  
850 Versmisse, I. Karlsson, B. Malleret, B. Targat, F. Barré-Sinoussi, R. Le Grand, G. Pancino,  
851 A. Sáez-Ciri3n, and B. Vaslin. 2015. Long-term control of simian immunodeficiency virus  
852 (SIV) in cynomolgus macaques not associated with efficient SIV-specific CD8+ T-cell  
853 responses. *J Virol* 89: 3542-3556.
- 854 58. Dunnett, C.W. 1955. A multiple comparison procedure for comparing several treatments  
855 with a control. *J Am Stat Assoc* 50: 1096-1121.
- 856 59. Donaldson, M. M., S. Kao, L. Eslamizar, C. Gee, G. Koopman, M. Lifton, J. E. Schmitz,  
857 A. W. Sylwester, A. Wilson, N. Hawkins, S. G. Self, M. Roederer, and K. E. Foulds. 2012.  
858 Optimization and qualification of an 8-color intracellular cytokine staining assay for  
859 quantifying T cell responses in rhesus macaques for pre-clinical vaccine studies. *J Immunol*  
860 *Methods* 386(0): 10-21.
- 861  
862  
863  
864

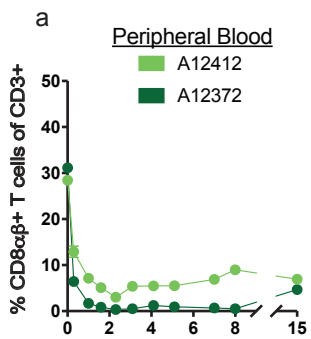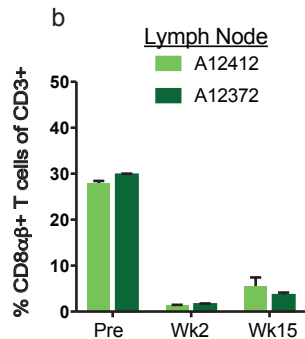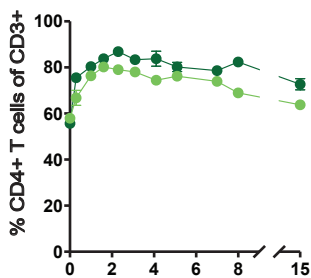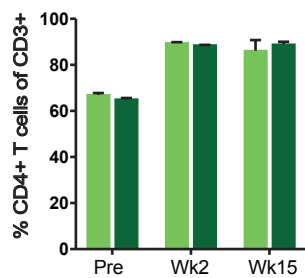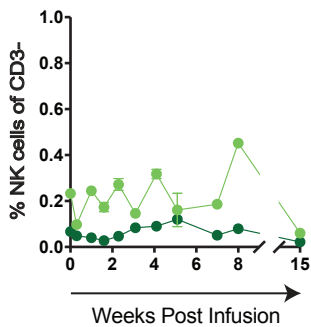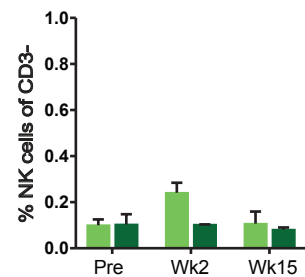

**a**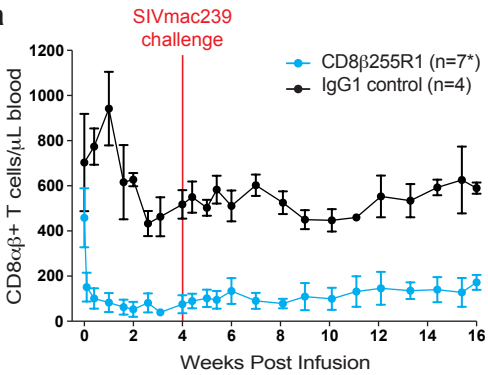**b** Week 3 LN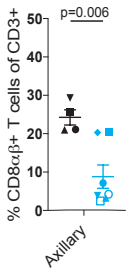**IgG1 control**

● cy0685    ▲ cy0756  
■ cy0750    ▼ cy0757

**c** Necropsy LN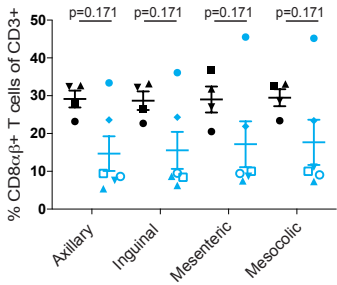**CD8 $\beta$ 255R1**

● cy0688    ▲ cy0755  
■ cy0690    ▼ cy0749  
▲ cy0691    □ cy0752  
● cy0753

a

**CD8 $\beta$ 255R1-treated**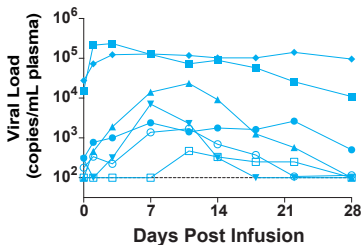

● cy0688    ● cy0755  
 ■ cy0690    ○ cy0749  
 ▲ cy0691    □ cy0752  
 ▼ cy0753

**Change from baseline**

| Day | p-value |
|-----|---------|
| 3   | 0.078   |
| 7   | < 0.001 |
| 10  | < 0.001 |
| 14  | 0.006   |
| 18  | 0.173   |
| 22  | 0.470   |
| 28  | 1.000   |

b

**Control IgG-treated**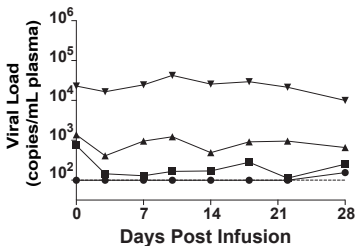

● cy0685    ▲ cy0756  
 ■ cy0750    ▼ cy0757

**Change from baseline**

| Day | p-value |
|-----|---------|
| 3   | 0.065   |
| 7   | 0.365   |
| 10  | 0.873   |
| 14  | 0.230   |
| 18  | 0.819   |
| 22  | 0.254   |
| 28  | 0.297   |

## Peripheral Blood

CD8 $\beta$ 255R1 —●—  
Control IgG —●—

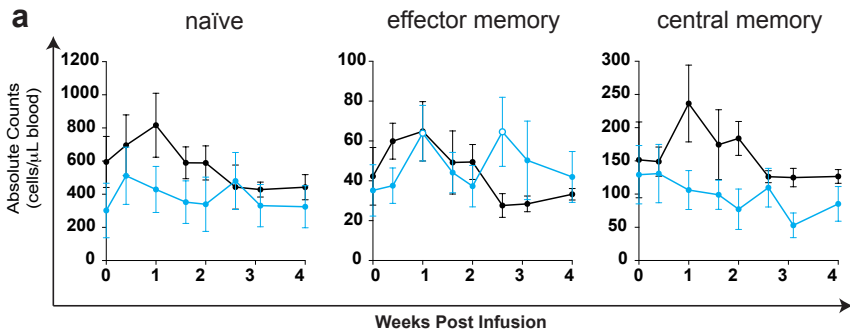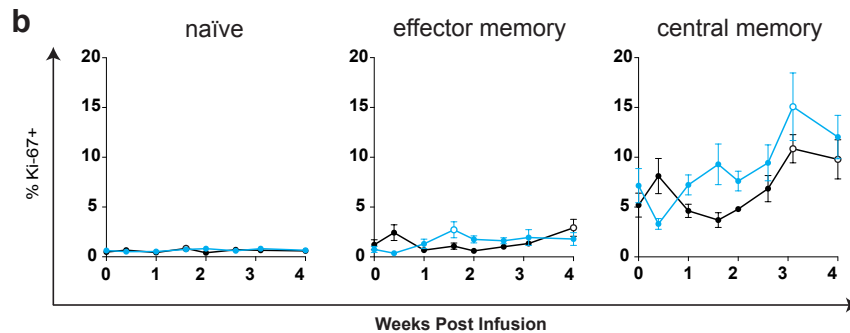

## Lymph Node

**c**

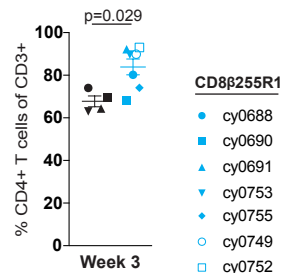

**d**

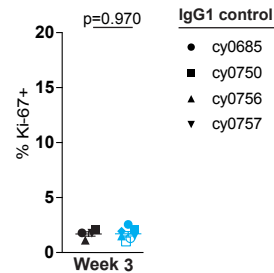

## Peripheral Blood

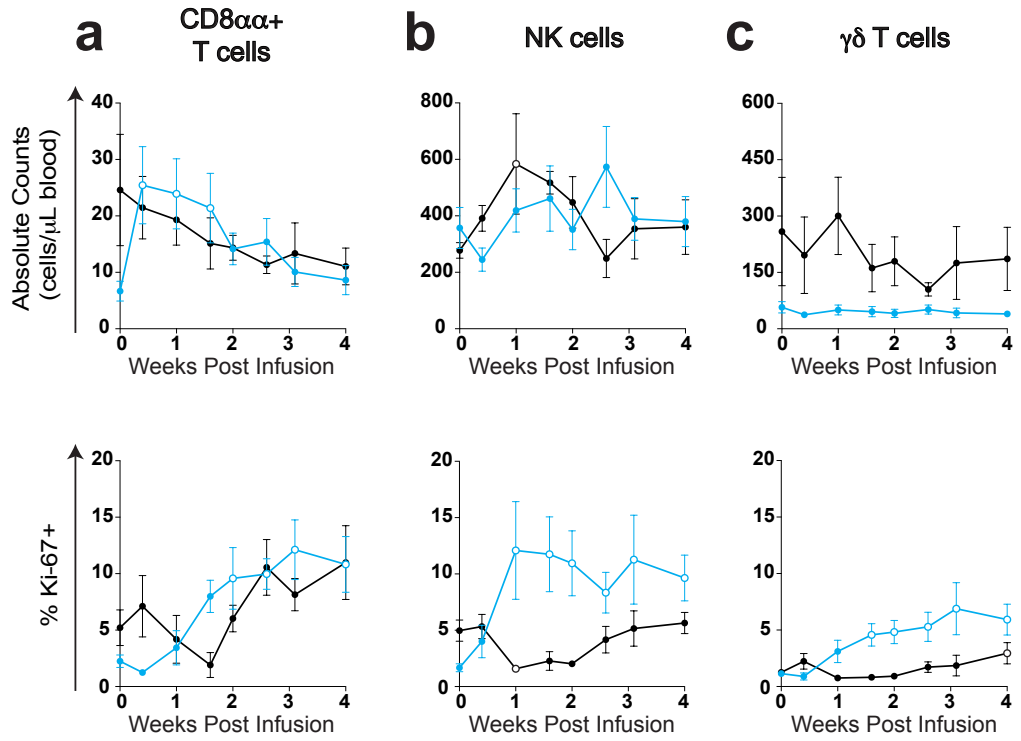

## Lymph Node

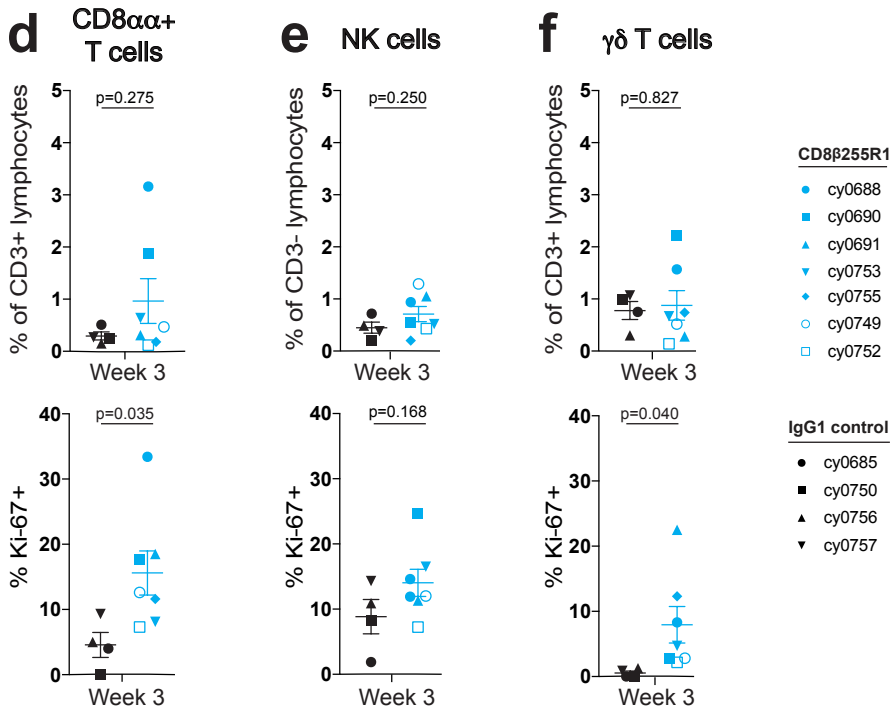

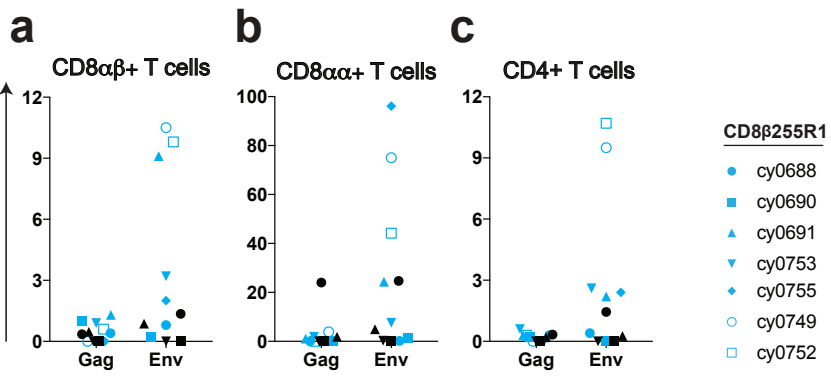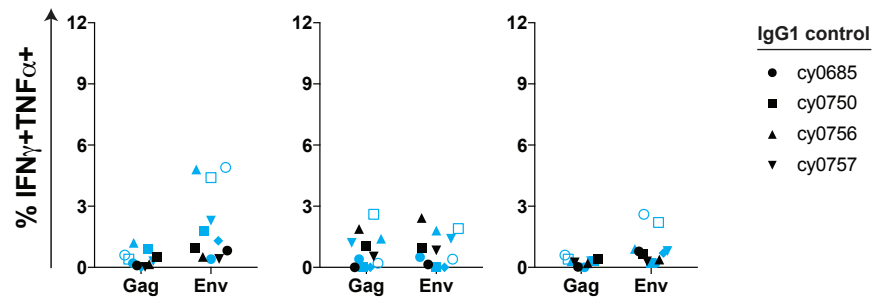



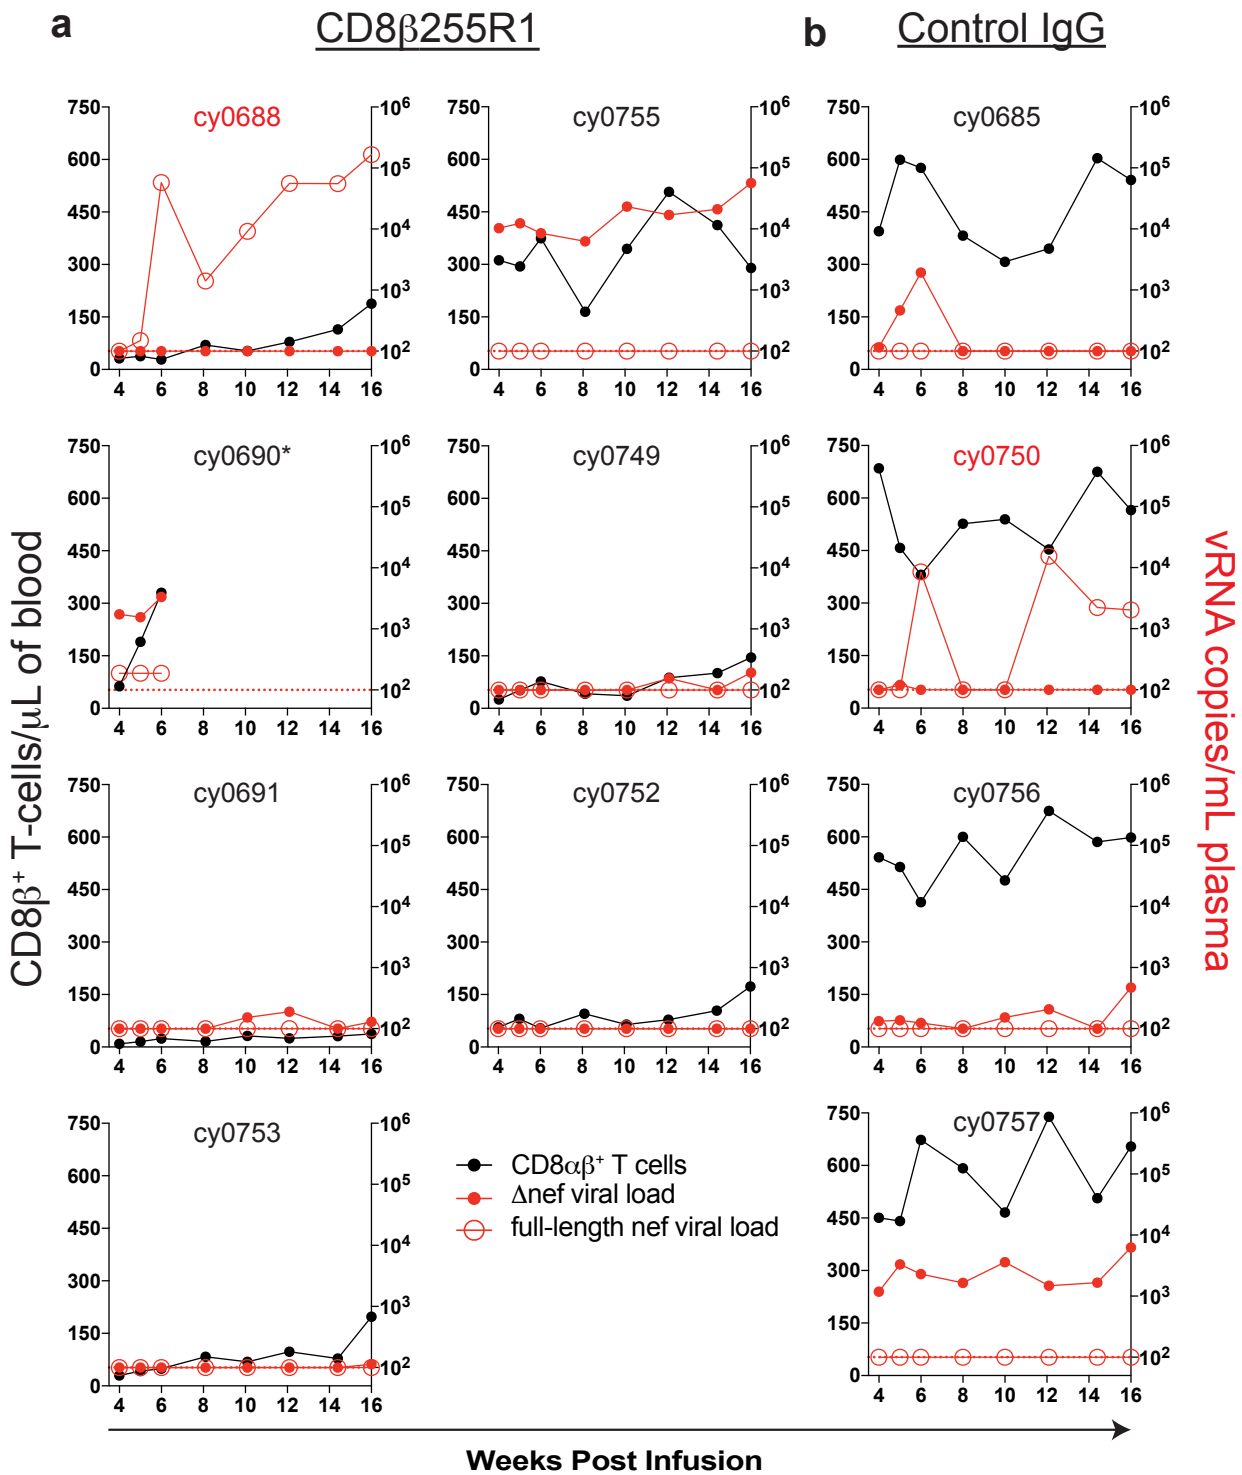

## a Control IgG

|        | Pre-Infusion |                      |              |           |
|--------|--------------|----------------------|--------------|-----------|
|        | SIVmac251.H9 | SIVsmE660<br>CP3C-A8 | SIVmac251.30 | SIVmac239 |
| cy0685 | 14005        | 12796                | 9            | <5        |
| cy0750 | 52671        | 30452                | <5           | <5        |
| cy0756 | 29731        | 14817                | 44           | 7         |
| cy0757 | 101344       | 50291                | <5           | <5        |

|        | Pre-Challenge |                      |              |           |
|--------|---------------|----------------------|--------------|-----------|
|        | SIVmac251.H9  | SIVsmE660<br>CP3C-A8 | SIVmac251.30 | SIVmac239 |
| cy0685 | 14802         | 14726                | <5           | <5        |
| cy0750 | 60539         | 35916                | 25           | 5         |
| cy0756 | 23512         | 14805                | 39           | <5        |
| cy0757 | 142641        | 56282                | 353          | <5        |

## b CD8 $\beta$ 255R1

|        | Pre-Infusion |                      |              |           |
|--------|--------------|----------------------|--------------|-----------|
|        | SIVmac251.H9 | SIVsmE660<br>CP3C-A8 | SIVmac251.30 | SIVmac239 |
| cy0688 | 14474        | 8448                 | 38           | 6         |
| cy0690 | 196887       | 163639               | 176          | 32        |
| cy0691 | 18082        | 18310                | <5           | <5        |
| cy0753 | 16320        | 5987                 | <5           | <5        |
| cy0755 | 196391       | 170995               | 37           | 11        |
| cy0749 | 63018        | 36702                | 50           | 9         |
| cy0752 | 14370        | 8016                 | 46           | <5        |

|        | Pre-Challenge |                      |              |           |
|--------|---------------|----------------------|--------------|-----------|
|        | SIVmac251.H9  | SIVsmE660<br>CP3C-A8 | SIVmac251.30 | SIVmac239 |
| cy0688 | 46026         | 19218                | <5           | 5         |
| cy0690 | 241367        | 191707               | 105          | 35        |
| cy0691 | 81148         | 79374                | <5           | <5        |
| cy0753 | 89786         | 40222                | 337          | 25        |
| cy0755 | 331729        | 233600               | 48           | <5        |
| cy0749 | 152644        | 93467                | 76           | 15        |
| cy0752 | 20639         | 16873                | 59           | 9         |

### ID50

|    |      |        |          |             |                |          |
|----|------|--------|----------|-------------|----------------|----------|
| <5 | 5-10 | 10-100 | 100-1000 | 1000-10,000 | 10,000-100,000 | >100,000 |
|----|------|--------|----------|-------------|----------------|----------|
